1 Rapid and stable microbial community assembly in the headwaters of third-order stream

2

3 Morgan E. Teachey<sup>a</sup>, Jacob M. McDonald<sup>b</sup>, Elizabeth A. Ottesen<sup>a#</sup>

4

5 <sup>a</sup>University of Georgia, Department of Microbiology, Athens, Georgia, USA

6 <sup>b</sup>University of Georgia, Warnell School of Forestry and Natural Resources, Athens, Georgia,

7 USA

8

9 Running title: Microbial assembly in stream headwaters

10

11 #Address correspondence to Elizabeth A. Ottesen, [ottesen@uga.edu](mailto:ottesen@uga.edu)

12

13

14

15

16

17

18

19

20

21

22

23

## 24 Abstract

25 Small streams and their headwaters are a key source of microbial diversity in fluvial systems and  
26 serve as an entry point for bacteria from the surrounding landscape. Community assembly  
27 processes occurring in these streams shape downstream population structure and nutrient cycles.  
28 To elucidate the development and stability of microbial communities along the length of a first  
29 through third order stream, fine-scale temporal and spatial sampling regimes were employed  
30 along McNutt Creek in Athens, Georgia, USA. 16S rRNA gene libraries were constructed from  
31 samples collected on a single day from 19 sites spanning the first 16.76 km of the stream.  
32 Selected sites at the upper, mid, and lower reaches of the stream were sampled daily for 11 days  
33 to evaluate community variability over time. In a second study, sites at and near the creek's  
34 headwaters were sampled daily for 11 days to understand the initial stages of bacterioplankton  
35 community assembly. In all studies, we observed decreasing alpha and beta diversity with  
36 increasing downstream distance. These trends were accompanied by the enrichment of a small  
37 fraction of taxa found at low abundance in the furthest-upstream environments. Similar sets of  
38 taxa consistently increased significantly in relative abundance in downstream samples over time  
39 scales ranging from 1 day to 1 year, many of which belong to microbial clades known to be  
40 abundant in freshwater environments. These results underpin the importance of headwaters as  
41 the site of rapid in-stream selection that results in the reproducible establishment of a highly  
42 stable community of freshwater riverine bacteria.

43

## 44 Importance

45 Headwater streams are critical introduction points of microbial diversity for larger connecting  
46 rivers and play key roles in the establishment of taxa that partake in in-stream nutrient cycling.

47 We examined microbial community composition of a first- through third-order stream using fine-  
48 scale temporal and spatial regimes. Our results show that the bacterioplankton community  
49 develops rapidly and predictably from the headwater population with increasing total stream  
50 length. Along the length of the stream, the microbial community exhibits substantial diversity  
51 loss and enriches repeatedly for select taxa across days and years, although the relative  
52 abundances of individual taxa vary over time and space. This repeated enrichment of a stable  
53 stream community likely contributes to the stability and flexibility of downstream communities.

54

## 55 Introduction

56 Riverine systems act as an interface between many distinct habitat types, connecting hillslope  
57 and bottomland soils to downstream bodies of water and controlling the flow of bacteria and  
58 nutrients from one environment into the next. In many fluvial systems, alpha and beta diversity  
59 both typically decrease along the length of a stream or stream network (1-11). This suggests that  
60 headwater streams are a critical source of microbial biodiversity. The primary source of microbes  
61 entering headwater bacterial communities appears to be soil and soil waters (1, 2, 8, 12), with  
62 pelagic stream community assembly resulting from the enrichment of bacteria present in these  
63 environments at low abundance. From the headwaters, the bacterioplankton community  
64 continues to develop as it travels through the stream network (10, 11, 13).

65 Pelagic stream communities are renewed continuously via the paired forces of in-stream  
66 selection and bulk transport of organisms from upstream and upslope environments. This raises  
67 the possibility of rapid and significant shifts in community composition within streams resulting  
68 from fluctuations in physicochemical conditions, flow rates, and the composition or origin of  
69 microbes entering the stream. Temporal trends in community profiles have been described in

70 many riverine systems (3, 5-7, 12-18). In several of these studies, the same taxa were found over  
71 time, varying in abundance based on shifts in physiochemical factors or following landscape-  
72 level disturbances (5, 10, 13, 17-20). This reoccurrence of taxa has led several groups to suggest  
73 the presence of a core community that is of particular importance in shaping riverine community  
74 dynamics (2, 9, 10, 13, 21-23). Conversely, multiple studies have also found substantial variation  
75 in microbial community structure and function over time in a wide range of study systems (3, 5,  
76 6, 10, 15-18, 20, 22, 24). A temporal study of headwater streams and an adjoining higher-order  
77 stream by Portillo et al. (24) found seasonal variation among samples taken from the same site.  
78 Despite their proximity, samples clustered by site regardless of collection day (24). These  
79 findings indicate fluvial core community may either fluctuate over time, or that changing  
80 environmental conditions can lead to alterations in the relative abundance of core vs. transient  
81 community members.

82 Few studies have evaluated the extent of short-term variability between the microbial  
83 communities of headwater streams, as well as how daily fluctuations in upstream community  
84 composition may impact downstream community structure and function. Further investigation  
85 into the assembly and stability of small stream bacterioplankton populations on both fine  
86 temporal (days) and spatial scales is necessary to advance the current understanding of the initial  
87 development of freshwater pelagic communities. Fundamental questions remain, including: 1)  
88 To what extent are fine-scale spatial patterns of community diversity and composition  
89 reproducible over time?; and 2) Do in-stream communities exhibit a temporal memory, or  
90 distance-decay relationship, and at what time scale(s)? To directly assess this knowledge gap,  
91 two multi-day studies on a small creek in Athens, GA, USA were performed.

92 Our chosen study site, McNutt Creek (Figure 1A), has consistently demonstrated a loss of  
93 diversity with increasing dendritic distance as well as a corresponding increase in common  
94 freshwater taxa across seasons, as seen in larger riverine systems and higher-order streams (25).  
95 These characteristics make McNutt Creek an ideal study system to address these questions  
96 regarding bacterial community assembly in headwater streams. In this work, a rapid rise in  
97 dominance of freshwater-associated bacterial taxa along the stream flow path was observed.  
98 Community assembly was renewed daily and quickly recovered following landscape-level  
99 disturbance, revealing robust community stability across the stream's flowpath.

100

## 101 Methods

### 102 *Sampling schemes*

103 Pelagic water samples were collected from McNutt Creek, Athens, GA, USA  
104 (33°55'50.29"N, 83°30'30.91"W). Nineteen sampling locations were selected based on their  
105 location in the stream network (headwaters versus main stem) and the ability to access these  
106 sites, as some were located on private property and required the consent of the owners. Water  
107 samples were collected in 2016 and 2017 to assess community assembly and stability along the  
108 headwater (1<sup>st</sup> order) to main stem (3<sup>rd</sup> order) longitudinal gradient. In 2016, three streams (sites  
109 3, 12, and 19) were sampled daily from June 9<sup>th</sup> to June 19<sup>th</sup>. On June 14<sup>th</sup>, all nineteen sites were  
110 sampled within 7 hours. Three groups of three to four volunteers each were sent out in groups to  
111 survey a third of the creek, working from the most upstream site downstream.

112 At each site, water was collected mid-stream from the water column approximately at  
113 mid-depth in 4 L acid-washed cubitainers. Each container was rinsed with stream water three  
114 times before the final sample was collected. Water was processed either immediately on-site or

115 within an hour of collection following the sampling methods outlined in Hassell et al. (10).  
116 Samples were run through sterilized tubing with in-line filtration through a 5.0  $\mu\text{m}$ , 47 mm  
117 diameter SVPP pre-filter (Millipore) to capture particulate matter. The effluent was then run  
118 through a 0.22 $\mu\text{m}$ , 2 ml sterivex filter (Millipore). A total of 500ml of water was filtered for each  
119 sample. Filters were preserved at -80 °C until DNA extraction. In addition to the filtered water  
120 samples, a YSI Professional Plus meter was used to temperature, pH, dissolved oxygen  
121 percentage, and conductivity (Table S2). Dissolved organic carbon (DOC), total dissolved  
122 nitrogen (TDN), and total dissolved phosphorus (TDP) were measured for selected filtered water  
123 samples by the Stable Isotope Ecology Lab at the University of Georgia (Table S2). Daily air  
124 temperature measurements were available through Weather History for Athens  
125 (<https://www.wunderground.com/history/airport/KAHN/>) and daily precipitation measures were  
126 available through the National Weather Service  
127 ([https://www.weather.gov/ffc/rainfall\\_scorecard](https://www.weather.gov/ffc/rainfall_scorecard)).

128 In 2017, sampling was focused on headwater-proximal sites (Sites 1-6) to determine the  
129 reproducibility of initial community assembly. Sites 1, 3, and 6 were sampled daily from August  
130 24<sup>th</sup> to September 3<sup>rd</sup>. On August 24<sup>th</sup>, August 29<sup>th</sup>, and September 3<sup>rd</sup> samples were collected  
131 from all six upper-most sites (sites 1-6). The 2017 samples were collected using the same  
132 methods as used in 2016.

133

#### 134 *Watershed Characteristics*

135 Geographic information system (GIS) analysis was used to determine physical  
136 differences between each site's watershed, drainage network, and land use/land cover. ArcMap  
137 10.5 was used to calculate each sample site's watershed area, total cumulative dendritic distance

138 (CDD), land use/land cover characteristics, and impervious surface area. Each sample point's  
139 watershed was delineated using “Hydrology” tools in the Spatial Analyst toolbox and the  
140 National Elevation Dataset's 30 m digital elevation model (DEM) (26). Flow direction and flow  
141 accumulation rasters were created from a hydrologically-corrected DEM (“Fill” tool was used to  
142 correct the DEM). After the sampling points were associated with the flow accumulation raster  
143 (using the ‘Snap Pour Point’ tool), each watershed was delineated using the ‘Watershed’ tool.  
144 Total dendritic distance was calculated by using each sampling point’s watershed to clip the  
145 high-resolution National Hydrography Dataset’s stream layer (27). Similarly, each watershed  
146 was used to extract land use/land cover characteristics and impervious surface cover from the  
147 2011 National Land Cover Database (28, 29).

148

#### 149 *DNA extraction*

150 DNA was extracted from the sterivex filters following the methods outlined in Hassell et  
151 al. (2018) (10). Filters were thawed, then 1ml of lysis buffer (40 mM EDTA, 50 mM Tris (pH  
152 8.3), 0.73 M Sucrose) and lysosome dissolved in lysis buffer (2.11 mg/ml final concentration)  
153 were added and incubated at 37° C for 30 min while rotating. Proteinase K dissolved in lysis  
154 buffer (0.79 mg/ml final concentration) and 200ul 10% SDS was added for a second incubation  
155 step at 55° C for 2 h. Lysate was extracted and mixed with an equal volume of  
156 Phenol:Chloroform:IAA (25:24:1; pH 8.0). Samples were centrifuged for 5 min at 3500xG and  
157 the top phase was saved. 0.04 x volume 5M NaCl and 0.7 x volume isopropanol was added,  
158 mixed, and incubated at room temperature for 10 min. Samples were centrifuged for 15 min at  
159 17,000xG and supernatant was discarded. DNA was resuspended in 400ul elution buffer (Omega  
160 Biotek, Norcross, GA, USA) and incubated at 65° C while rotating for 10 min. DNA was then

161 processed using Omega Biotek's E.Z.N.A. Water DNA kit following manufacturer protocol from  
162 step 13 through completion (Omega Biotek, May 2013 version).

163

#### 164 *Sequencing and analysis*

165       Following the methods outlined in Tinker and Ottesen (30), the V4 region of the 16S  
166 rRNA gene was amplified in each DNA sample. The resulting library was submitted to the  
167 Georgia Genomics Facility for sequencing (Illumina MiSeq 250 × 250 bp; Illumina, Inc., San  
168 Diego, CA). The resulting raw sequences from these experiments are available under the  
169 accession numbers SRP155540 in the NCBI Sequence Read Archive.

170       Returned reads were processed using the mothur software package (31) following the  
171 MiSeq standard operating protocol with the following modifications: reads that fell outside of  
172 200-275bp were excluded from contig generation; SILVA reference database release v123 was  
173 used for sequence alignment; primers GTGCCAGCMGCC-GCGGTAA and  
174 GGACTACHVGGGTWTCTAAT to perform in-silico PCR; the VSEARCH algorithm was used  
175 to identify chimeric sequences (32); taxonomic classification was completed via the Wang  
176 Method using the May 5<sup>th</sup>, 2013 release of the greengenes reference database, version 13\_8, in  
177 combination with the FreshTrain dataset following the TaxAss workflow (33-35); during  
178 taxonomic assignment a bootstrap value of 70 was used; an additional remove.lineage command  
179 was run to ensure that sequences from cyanobacteria, chloroplasts, and unknown taxa were  
180 removed. Operational taxonomic units (OTUs) were called at 97% or greater sequence similarity.  
181 From the 91 samples that were collected from these studies, a total of 6 119 579 of 16S rRNA  
182 gene sequences passed quality filtering steps, resulting in an average of 67 248 sequence reads  
183 and 1 562 OTUs per sample (Table S1).



184 Statistical analysis was completed in R using the vegan package (36). When necessary for  
185 analysis, samples were rarefied to a depth of 3 291 sequences. The envfit function was used to  
186 calculate significant ( $p \leq 0.01$ ) physiochemical parameters and watershed characteristics that are  
187 displayed as loadings on ordination plots. The cor.test function was utilized to test for  
188 significance of Spearman's correlations. T-tests were used to determine significance between  
189 boxplots.

190

## 191 Results

### 192 *Study site and physicochemical data*

193 McNutt Creek is a 20 km-long stream in Athens, GA, USA that flows through a mixed  
194 land use area, spanning agricultural, residential and forested sections (Fig. 1A, Table S2). Stream  
195 width ranges from 1.10 m (site 1) to 5.18 m (site 19). McNutt Creek is part of the Upper Oconee  
196 Watershed, a temperate, urban watershed that provides drinking water for the city of Athens and  
197 the surrounding area. Two studies of temporal and spatial dynamics in microbial community  
198 composition in McNutt Creek were conducted.

199 The first study (in 2016) was an 11-day daily collection of samples at 19 sites along the  
200 entire creek length. Water was also collected at three sites (sites 3, 12, 18) for the five days  
201 immediately preceding and following the 19-site collection to survey daily community shifts  
202 along the creek length. During the 2016 study period, 9 June through June 19, the average daily  
203 high and low air temperatures were 33.69 °C and 20.20 °C, respectively (Table S2). The average  
204 water temperature (22.96 °C) generally increased downstream, with a minimum of 20.15 °C (site  
205 2) and a maximum of 24.98 °C (site 18). There was measurable precipitation on June 11<sup>th</sup> (0.33  
206 cm), 12<sup>th</sup> (0.31 cm), 14<sup>th</sup> (1.56 cm), and 17<sup>th</sup> (0.20 cm) for a total of 2.39 cm of rain during the

207 2016 study. All samples collected on June 14 were taken before the rainfall, with the exception  
208 of site 4.

209 TDP, TDN, and DOC were measured for samples collected on June 14<sup>th</sup>. TDP ranged  
210 from 11.28-49.24 mg/L with an average of 24.84 mg/L, and no trend was observed along the  
211 flow path. TDN fluctuated among the headwater-proximal sites before stabilizing around 0.6  
212 mg/L. Average TDN was 0.64 mg/L, with a range of 0.45-1.02 mg/L. DOC was relative stable at  
213 all sites, with the exception of site 7, and averaged at 1.45 mg/L, with a minimum of 0.99 at site  
214 16 and 6.44 mg/L at site 7.

215 To address fluctuations in community profiles at the headwaters, a second study in 2017  
216 focused on the six most upstream sites (sites 1-6). Water was collected from each upstream site  
217 on study days 1, 6, and 11. To understand daily changes in headwater community composition,  
218 sites 1, 3, and 6 were sampled daily for 11 days. Average daily air temperatures were slightly  
219 lower than observed during the 2016 study, with an average high and low of 29.14 and 18.73 °C,  
220 respectively (Table S2) (37). Average water temperature was 20.15 °C, with minimum and  
221 maximum water temperatures of 18.53 (site 1) and 21.59 °C (site 6). A total of 3.03 cm of  
222 rainfall fell during the 2017 study, with measurable precipitation occurring on August 30<sup>th</sup> (0.43  
223 cm) and 31<sup>st</sup> (2.59 cm). TDN, TDP, and DOC were measured at site 3 on all days, and averaged  
224 0.48, 29.51, and 1.33 mg/L respectively, comparable to measurements taken in 2016.

225

### 226 *Longitudinal study of McNutt Creek*

227 In the 2016 longitudinal study, alpha diversity (Shannon's) significantly decreased with  
228 increasing cumulative dendritic distance (CDD;  $p < 1 \times 10^{-4}$ ,  $\rho = 0.63$ ) (Fig. 1C). The microbial  
229 community at the headwaters (site 1) was highly diverse, with 47.44% of sequences belonging to

230 taxa present at < 1.5% of the community (Fig. 1B). The fraction of the population defined by  
231 lower-abundance taxa (“others”, <1.5%) progressively decreased with increasing CDD, shifting  
232 from 52.26% at site 1 to 29.50% at site 19, with a minimum of 21.28% sequences present at site  
233 12.

234 To explore changes in microbial community structure and beta diversity, principal  
235 components analysis (PCA) was completed using rarified samples (Fig. 1E). Log-transformed  
236 total CDD correlates strongly with the position of samples along the first principal component  
237 (Fig 1E inset,  $p < 1 \times 10^{-4}$ ,  $R^2 = 0.79$ ). Upstream samples are scattered but downstream sites are  
238 clustered more tightly, suggesting a decrease in variance with increasing CDD. Incorporation of  
239 physiochemical, land use, and nutrient data suggest that tree cover type (deciduous upstream,  
240 evergreen downstream), dissolved oxygen levels, and urbanization factors may influence  
241 microbial community structure (Fig. S1). However, given that only a single linked flow path is  
242 being examined, these relationships are difficult to interpret and may be autocorrelative.

243 To directly assess distance-decay relationships along the length of the stream, Bray Curtis  
244 dissimilarity (weighted and unweighted) was calculated between each sample site and plotted  
245 against the length of stream between them (Fig. S2). These relationships were calculated in terms  
246 of upstream and downstream proximity. For both weighted and unweighted measures, 12  
247 relationships were significant ( $p < 0.05$ ). All sites downstream of site 13 displayed significant  
248 dissimilarity between adjacent sites, indicating a downstream increase in similarity decay.

249 In an analysis of the 250 most abundant taxa, a statistically significant negative  
250 correlation (Spearman,  $p < 0.05$ ) was found between the relative abundances of 76 OTUs and  
251 CDD (Fig 2). Together, negatively correlated taxa represent 49.16% of sequences in headwater  
252 site and 6.58% of sequences at site 19 (Fig. 2B). In contrast, a statistically significant positive

253 correlation was found between 36 OTUs and total CDD (Fig. 2A). Positively correlated taxa  
254 include OTUs belonging to the freshwater-associated Actinobacteria clade Luna1-A OTU2, and  
255 Bacteroidetes clades bacIII-A OTU3 and bacI-A OTU6 (nomenclature from Newton et al., (38))  
256 (Fig. 2A). All positively correlated taxa together represent 4.44% of sequences in the furthest  
257 headwater site (Site 1) and 45.81% of sequences in the furthest downstream site (Site 19).

258

259 *Daily fluctuations in community composition at the upper, middle, and lower reaches of McNutt*  
260 *Creek*

261 Daily assessment of sites 3, 12, and 18 during June 2016 revealed that the taxonomic  
262 profile of the community at each site was relatively stable at the OTU level (Fig. 3A). For site 3,  
263 675 OTUs (out of 14 860 observed) were shared across the entire 11-day time series,  
264 representing an average of 96.11% (range 95.12 -97.20%) of recovered sequences. For site 12,  
265 513 OTUs were shared across the sampling period (out of 15 022), representing an average of  
266 96.75% (range 95.47 -97.64%) of recovered sequences. For site 18, 413 OTUs were shared  
267 across the 11-day time series (out of 15 122), representing an average of 95.17% (range 88.30-  
268 97.47%) of recovered sequences. Across all dates and times, 344 OTUs were shared,  
269 representing 93.61% of recovered sequences.

270 Alpha diversity measurements fluctuated at all sites throughout the study (Fig. 3B). The  
271 bacterial community at site 3 was generally the most diverse, showing the highest Shannon index  
272 value of the three sites in 9 of 11 days. Site 3's Shannon diversity was significantly higher than  
273 both other sites, with p-values of 0.004 (site 12) and 0.008 (site 18). Differences in Shannon  
274 index between sites 12 and 18 were smaller and not statistically significant. The relationship

275 between these sites were also less predictable, with 18 exhibiting a Shannon Index less than 12  
276 for only 4 of 11 days.

277 Beta diversity analyses suggest that site 3 hosted a distinct community from downstream  
278 sites. Weighted Bray-Curtis analyses show the median dissimilarities between site 3 and the two  
279 downstream sites are markedly higher than the median dissimilarity between sites 12 and 18.  
280 Similarly, PCA analysis shows a clear separation of site 3 from the downstream samples (Fig.  
281 3C), while samples from sites 12 and 18 cluster together. Though there were no significant  
282 differences between site 3's ordination points and site 12's or 18's ordination points, significant  
283 differences in water temperature may be driving this separation ( $p < 0.001$ ). Analysis of Bray  
284 Curtis dissimilarities between successive samplings at the same site shows temporal trends in  
285 community similarity over time for abundance-weighted ( $p = 0.012$  [site 3],  $0.013$  [site 18]) but  
286 not unweighted (presence/absence) measures (Fig. S3). No significance was found for either  
287 measure at site 12.

288 To understand which taxa consistently increase or decrease downstream, downstream  
289 trends in the abundance of the 250 most-abundant taxa were analyzed. 213 were found to  
290 decrease downstream on at least one day. ZB2 OTU208, ABY1 OTU280, unclassified  
291 Rhodospirillaceae OTU38, and bacII-A OTU4 all decreased downstream on 10 of the 11  
292 sampling days. In contrast, 94 of the 250 were identified as increasing on at least one day,  
293 although only 12 increased on at least 5 days. BacI-A OTU6 and bacIII-A OTU3 were found to  
294 increase between sites 3, 12, and 18 during multiple days. Alphaproteobacterium Alf-V OTU193  
295 was the most consistent OTU of the top 250, increasing down the stream length for 9 of the  
296 sampling days. Other organisms, such as Luna1-A OTU2, bacV OTU10, betI-A OTU1, and

297 betIV OTU11, that increased along the full flow path in the 19-site study only exhibited  
298 increases across these three sites for a few of the individual sampling days.

299

### 300 *Temporal and spatial trends in community assembly at headwater proximal sites*

301 The 2017 spatial and temporal study was aimed at examining community assembly near  
302 the stream headwaters in greater temporal and spatial detail. Three longitudinal studies of the 6  
303 most uppermost stream sites were performed at 5-day intervals to evaluate longitudinal trends in  
304 community composition (Fig. 4). Across these three collections, qualitatively similar trends in  
305 taxonomic composition were observed (Fig. 4A). Alpha diversity was significantly correlated  
306 with log CDD on the second (but not the first or third) longitudinal sample collection ( $p =$   
307 0.0045) (Fig. 4B). Paralleling the results from the full stream length study in 2016, more taxa  
308 significantly decreased (93 OTUs showed negative relationships on at least 1 of the three days)  
309 along the flow path than increase (9 OTUs), but those that increase in abundance comprised a  
310 substantial fraction of the total population by sites 5 and 6 (Fig. S4). 35 of the 93 taxa exhibiting  
311 significant negative relationships and two of the nine taxa exhibiting positive relationships  
312 (Luna1-A OTU2 and bacIII-A OTU3) with CDD also did so in the 2016 study (Fig. S4, Fig. 2).

313 Daily fluctuations in microbial community composition were evaluated at sites 1, 3, and  
314 6 from August 24-September 3, 2017 (Fig. 5A). Alpha and beta diversity were consistently  
315 greater at site 1 and lower at sites 3 and 6, in a manner similar to that of the whole stream (Fig.  
316 1C). Site 1 was found to be significantly more diverse (Shannon,  $p = 0.0057$ ,  $1.077 \times 10^{-5}$ ), than  
317 sites 3 and 6, which were not significantly different. Day-to-day beta dissimilarity was assessed  
318 for each focus site (site 1, 3, and 6) to understand community change over time (Fig. 5D).  
319 Median weighted Bray Curtis dissimilarity across time was higher at site 1 than either

320 downstream site, significantly different from site 3 by presence-absence measures ( $p = 0.0219$ )  
321 and from site 6 by both measures ( $p = 0.0034$ ,  $<1 \times 10^{-4}$ ). Median unweighted dissimilarity was  
322 greatest and most variable at site 6. At site 1, 197 OTUs out of 15 338 were shared across the  
323 entire 11-day time series, representing an average of 87.11% (range 81.83- 94.35%) of sequences  
324 recovered from this site. For site 3, 97 (of 15 438) were shared across the sampling period,  
325 representing an average of 86.31% (range of 71.42-98.70%). This was substantially lower than  
326 the 675 OTUs shared at this site during the 2016 daily study. For Site 6, 34 OTUs (of 15 501)  
327 were shared across the 11-day time series, representing an average of 91.06% (range 76.18-  
328 98.65%) of recovered sequences.

329 In a PCA of these data (Fig. 5C), samples clustered by site, suggesting each location had  
330 a distinct microbial community, potentially driven by significant physiochemical differences  
331 (pH,  $p < 1 \times 10^{-4}$ ; conductivity,  $p = 0.0006$ ; temperature,  $p = 0.0006$ ). PERMANOVA found a  
332 significant effect of site but not sampling day on community composition ( $p = 0.001$  for site,  
333 0.12 for day). No individual sites exhibited significant temporal distance-decay relationships in  
334 Bray-Curtis dissimilarity, with samples taken 24 hours apart showing similar levels of  
335 dissimilarity as to samples taken up to 5 days apart (Fig. S5).

336 All three sites were consistently dominated by bet1-A OTU1 during the study period, and  
337 no consistent trend in its abundance was observed between sites. However, other Proteobacteria  
338 showed positional trends in representation. For example, alfVI OTU26 and betIV OTU11, were  
339 found to increase on 5 days, though they showed decreases on a single study day. Other  
340 proteobacterial OTUs were noted to decrease over the study period, including Telamatospirillum  
341 OTU46, Bdellovibrio OTU17, and Geobacter OTU47. As was observed in 2016, Luna1-A  
342 OTU2, and bacIII-A OTU3 increased across the three sites on 8 or more of the study days.

343 Interestingly, bacII-A OTU4 exhibited a positive trend with total CDD on 6 of the 11 sampling  
344 days in 2017. These results are in stark contrast to the negative trends this OTU exhibited for 10  
345 out of 11 days in 2016.

346 The 2.54 cm rain event captured between day 7 and 8 (August 30<sup>th</sup> and 31<sup>st</sup>) had variable  
347 effects on the abundance of prominent taxa at each site. As mentioned above, several  
348 Proteobacteria, which increased along the sampled flow path on other days, decreased on either  
349 day 8 or 9. This was also the case for bacV OTU10, though this OTU had inconsistencies in  
350 trend direction in the 2016 study. Taxa that typically showed positive trends with CDD (e.g.  
351 Luna1-A OTU2, bacIII-A OTU3, bacII-A OTU4), did not on days 8 or 9 but returned to  
352 exhibiting trends in increasing on day 10. Days 8 and 9 also showed differences in the relative  
353 prevalence of low-abundance taxa (“others”) at each site: site 3, for example, averaged 51.14%  
354 on days 8 and 9 and 19% across the rest of the time series.

355

### 356 *Comparisons of community composition at daily to annual time scales*

357 In the August 2017 headwater time series, Proteobacteria were dominant across all days  
358 and sites at substantially higher abundances than observed in the 2016 study (Fig. 4, 5).  
359 Proteobacteria represented 54.56% of sequences at site 3 in 2016 and 67.33% in 2017 during  
360 both 11-day sampling periods. Bacteroidetes and Actinobacteria, in contrast, were less abundant  
361 (average of 13.80% for Bacteroidetes and 11.55 % for Actinobacteria in 2016 vs. 6.88% and  
362 6.12%, respectively, in 2017). However, as in 2016, these phyla were observed to consistently  
363 rise in abundance with increased CDD (Fig. 4 and Fig. 5). At the OTU level, overlap across  
364 years was relatively low, with only 25 of the 8 943 OTUs detected across all samples in 2017



365 also present in all samples collected in 2016. However, these shared OTUs were among the most  
366 abundant sequences identified, including 24 of the 100 most abundant OTUs.

367 Because daily samples were collected at site 3 in both 2016 and 2017, we were able to  
368 directly compare community similarity across both daily and annual time scales (Fig. 6). The  
369 2017 daily time series exhibited significantly greater day-to-day dissimilarity by both weighted  
370 and unweighted measures than observed in 2016 (t-test,  $p = 0.01$  and  $p < 1 \times 10^{-4}$ , respectively). In  
371 fact, day-to-day variability in 2017 was similar in scale to cross-year variability between 2016  
372 and 2017. To account for the potential effects of the rain event on day 8 of the 2017 study,  
373 significance was re-evaluated by removing days 8 and 9 from the data set and rerunning  
374 dissimilarity calculations. Weighted dissimilarity was still significantly different although less so  
375 ( $p = 0.03$ ). Unweighted dissimilarity, however, was no longer significant ( $p = 0.97$ ). Principal  
376 components analysis shows some degree of clustering within years, with the 2017 samples  
377 largely separating along the first principal component (87.58% of variation), and 2016 samples  
378 separating along the second principal component (9.05% of variation), although no metadata  
379 besides collection year (envfit,  $p = 2 \times 10^{-4}$ ) was found to be significantly different between the  
380 two samples sets.

381

## 382 Discussion

383 This work examined the bacterial community assembly at a daily resolution in a third-  
384 order stream located in a temperate, urban watershed. While pelagic freshwater bacterioplankton  
385 communities have been previously described around the world, the stability and renewal of these  
386 populations in headwater streams remains in question. In particular, we aimed to elucidate, on  
387 fine temporal and spatial scales, the degree to which lower-order streams mimicked community

388 assemblages and diversity trends observed in higher order rivers and whole watersheds (1, 2, 4,  
389 8, 9, 11).

390         Along the length of McNutt Creek, an inverse relationship between alpha diversity and  
391 CDD was observed, which has been previously reported in other river systems (9, 10, 12, 23).  
392 Patterns of decreasing alpha diversity with downstream distance traveled were most apparent  
393 across the full stream length (Spearman's  $R^2 = 0.6298$   $p = 0.005$ ), however, site-to-site  
394 fluctuations were apparent in both daily studies. It is also of note that alpha diversity calculations  
395 for the 2017 study were typically lower than those recorded in 2016, although the cause of this  
396 diversity loss is unknown.

397         Downstream trends in site-to-site beta diversity comparisons were present but relatively  
398 weak, primarily exhibiting differences between the headwater and furthest sites downstream. For  
399 example, significant beta diversity relationships were found between site 3 and 18, and between  
400 sites 12 and 18 in the 2016 study. When dissimilarity was assessed along the entire stream length  
401 on a site-by-site basis, the majority of sites were found to have a significant positive correlation  
402 with distance, particularly at the extreme ends of the stream (Fig. S3). During 2017, the only  
403 significant beta diversity relationships were between site 1 and both downstream sites, 3 and 6.  
404 These results confirm earlier findings in the broader Upper Oconee watershed, where three of  
405 five seasons exhibited trends in beta diversity loss with increasing cumulative dendritic distance  
406 (10). This pattern of dissimilarity loss with increasing hydrologic distance is not unique to the  
407 Upper Oconee watershed, and was also observed across the Ybbs river network in Austria (2).

408         The effects of time between samples collected on community structure were apparent at  
409 some but not all sites, suggesting a limited impact of the previous community composition on  
410 later ones. A similar trend in diversity was recorded in rock biofilms in a headwater stream, in

411 which weekly samples from the same site were less similar than those taken from other locations  
412 along the creek, although site locations were considerably closer together than in the present  
413 work (39). As dispersal in streams is primarily unilateral as microbes are passively transported,  
414 this speaks to the strength of renewal of these communities and their resilience to immigrant taxa  
415 from neighboring environments.

416 Water temperature is the sole environmental factor that was found to have a statistically  
417 significant correlation with community composition over both time and space, suggesting that  
418 water temperature may play a key role in shaping stream community composition. None of the  
419 other physiochemical parameters measured in this study showed consistent, statistically  
420 significant correlations with community progression or composition. These results are not  
421 entirely surprising, given the results of a previous study on the greater Upper Oconee watershed,  
422 which found that position within the watershed showed far more significant impacts on  
423 community composition than individual physicochemical factors (10). In addition, studies in  
424 other fluvial and freshwater systems have found substantial temporal and spatial variability in the  
425 relative importance of different physiochemical parameters in shaping community composition  
426 (25, 40). Land use parameters associated with development were significantly associated with  
427 community composition across sites (Fig. S1), and similar relationships were also noted in de  
428 Olivera and Margis (13). However, in this study, these relationships are more likely to be a  
429 coincidental finding due to the fact that downstream portions of this stream happened to be more  
430 highly developed.

431 During the 2017 sampling period of headwater sites, a storm event resulting in 2.54 cm of  
432 rainfall occurred. Rainfall has previously been shown to introduce taxa into freshwater systems  
433 and increase diversity (22, 41, 42). While our results are consistent with this, it is interesting that

434 each of the three sites sampled appeared to be affected differently by the influx of rainwater. At  
435 site 1, we observed a notable loss of alpha diversity paired with the introduction of Bacteroidetes  
436 and Actinobacteria, while site 3 exhibited a noticeable increase in total diversity, and site 6  
437 exhibited a decrease in diversity and an increase in the fraction of Proteobacteria (Fig 2). All  
438 sites returned to post-rain community compositions within 48 hours (Fig. 4). Several other minor  
439 precipitation events occurred during both studies however no strong disturbance was detected in  
440 the community data. While further studies are merited to better understand both the consistency  
441 in disruption and recovery of bacterioplankton populations along the entire stream reach, these  
442 data suggest that headwater bacterial communities are highly resilient to rainwater influx.

443         Throughout both 2016 and 2017 studies, a small set of taxa found at low abundance in  
444 the headwaters of the stream was enriched in downstream sites. This enrichment corresponded  
445 with the significant decrease of many OTUs prevalent at the headwater sites. These findings  
446 support the hypothesis that freshwater streams function as major site of selection and species  
447 sorting (2, 8, 10, 12). The set of taxa that were specifically enriched in downstream environments  
448 was relatively consistent over time. Multiple OTUs were identified as significantly positively  
449 correlated with stream length across days and years, 36 and 9 of the 250 most abundant taxa in  
450 2016 and 2017 respectively. Many of these OTUs belonged to well-known ‘typical’ freshwater  
451 bacterial clades (10, 23, 25, 38), including: Luna1-A (OTU2), bacIII-A (OTU3), bacVI  
452 (OTU90), bacV (OTU10), betI-A (OTU1), betIV (OTU11), and bacI-A (OTU6). It is of note that  
453 in the 2016 study, a shift in prevalent Bacteroidetes members from bacII-A OTU4 in upstream  
454 environments to bacI-A OTU6 and bacIII-A OTU3 further downstream occurred, suggesting that  
455 certain Bacteroidetes clades are better adapted either for life in different regions of the stream or  
456 for long-term exposure in freshwater environments. Interestingly, bacII-A OTU4 was identified

457 as significantly positively associated with CDD in 2017, when only the upper reaches of the  
458 stream were examined.

459         These data parallel findings in the existing literature in which a consistent freshwater  
460 stream microbiome has been proposed (2, 9, 10, 13, 19, 21, 43), though the exact definition of  
461 this population and the nomenclature describing this phenomenon has been highly variable. For  
462 example, the “core” freshwater community of stream biofilms and sediment was defined by  
463 Besemer et al (2013) as taxa found in at least 50% of all samples (2). A stricter definition was  
464 employed in de Olivera and Margis’ seasonal study of an entire river length, describing the  
465 “core” community as taxa that persisted across all samples and timepoints (13). In contrast, Ruiz-  
466 Gonzalez et al. (21) defined the ‘core seed bank’ of bacterial taxa as those that were more  
467 abundant in downstream than upstream sites vs. ‘restricted’ taxa that decreased in abundance  
468 with increasing downstream distance. (21). It is clear that a select and consistent set of taxa  
469 dominate freshwater habitats in fluvial systems at all scales (23, 25, 40, 43). However, it is also  
470 clear that the abundances of these microbes can vary substantially, both within and between  
471 fluvial networks (40). While these variations are often posited to be driven by physicochemical  
472 variables, the relationships found between specific taxa and different environmental variables  
473 have often varied across studies (4, 16), and in some cases even across time within a single  
474 system (19). With these and other works, it becomes increasingly apparent that the concept of a  
475 ‘typical’ freshwater microbiome (25) extends across all levels of the freshwater continuum, with  
476 even a single stream exhibiting strong and reproducible selection for a small subset of microbial  
477 taxa that exhibit variable abundances over time.

478

479 Conclusions

480 In this work, we observed the rapid and consistent assembly of freshwater  
481 bacterioplankton communities in a small, temperate headwater creek, paralleling population  
482 trends reported in the entire watershed and in systems around the globe. Downstream travel was  
483 associated with a consistent enrichment of a set of bacterial taxa belonging to clades that are  
484 widely associated with freshwater environments (38). As these clades rise to dominate the  
485 bacterioplankton population, a larger number of taxa prevalent at the head of the stream decrease  
486 in abundance. These shifts in community composition gave rise to consistent trends in overall  
487 alpha and beta diversity along the length of the stream. However, substantial variability in  
488 community composition among low-abundance taxa was maintained at each site, with changes in  
489 community composition over 24 hours that in some cases mirrored dissimilarity among samples  
490 collected up to 1 year apart. Overall, these results underpin the importance of headwaters as the  
491 site of rapid in-stream selection that gives rise to a highly consistent, site-specific stream  
492 microbiome that dominates the water column of downstream environments.

493

#### 494 References

- 495 1. Beier S, Witzel KP, Marxsen J. 2008. Bacterial community composition in Central  
496 European running waters examined by temperature gradient gel electrophoresis and  
497 sequence analysis of 16S rRNA genes. *Appl Environ Microbiol* 74:188-99.
- 498 2. Besemer K, Singer G, Quince C, Bertuzzo E, Sloan W, Battin TJ. 2013. Headwaters are  
499 critical reservoirs of microbial diversity for fluvial networks. *Proc Biol Sci*  
500 280:20131760.
- 501 3. Hullar MA, Kaplan LA, Stahl DA. 2006. Recurring seasonal dynamics of microbial  
502 communities in stream habitats. *Appl Environ Microbiol* 72:713-22.

- 503 4. Crump BC, Adams, H. E., Hobbie, J. E., Kling, G. W. . 2007. Biogeography of  
504 Bacterioplankton in Lakes and Streams of an Arctic Tundra Catchment. *Ecology*  
505 88:1365-1378.
- 506 5. Fortunato CS, Eiler A, Herfort L, Needoba JA, Peterson TD, Crump BC. 2013.  
507 Determining indicator taxa across spatial and seasonal gradients in the Columbia River  
508 coastal margin. *ISME J* 7:1899-911.
- 509 6. Fortunato CS, Herfort L, Zuber P, Baptista AM, Crump BC. 2012. Spatial variability  
510 overwhelms seasonal patterns in bacterioplankton communities across a river to ocean  
511 gradient. *ISME J* 6:554-63.
- 512 7. Nino-Garcia JP, Ruiz-Gonzalez C, Del Giorgio PA. 2016. Interactions between  
513 hydrology and water chemistry shape bacterioplankton biogeography across boreal  
514 freshwater networks. *ISME J* 10:1755-66.
- 515 8. Ruiz-Gonzalez C, Nino-Garcia JP, Del Giorgio PA. 2015. Terrestrial origin of bacterial  
516 communities in complex boreal freshwater networks. *Ecol Lett* doi:10.1111/ele.12499.
- 517 9. Savio D, Sinclair L, Ijaz UZ, Parajka J, Reischer GH, Stadler P, Blaschke AP, Bloschl G,  
518 Mach RL, Kirschner AK, Farnleitner AH, Eiler A. 2015. Bacterial diversity along a 2600  
519 km river continuum. *Environ Microbiol* 17:4994-5007.
- 520 10. Hassell N, Tinker KA, Moore T, Ottesen EA. 2018. Temporal and spatial dynamics in  
521 microbial community composition within a temperate stream network. *Environ Microbiol*  
522 doi:10.1111/1462-2920.14311.
- 523 11. Sekiguchi H, Watanabe M, Nakahara T, Xu B, Uchiyama H. 2002. Succession of  
524 Bacterial Community Structure along the Changjiang River Determined by Denaturing

- 525 Gradient Gel Electrophoresis and Clone Library Analysis. Applied and Environmental  
526 Microbiology 68:5142-5150.
- 527 12. Crump BC, Amaral-Zettler LA, Kling GW. 2012. Microbial diversity in arctic  
528 freshwaters is structured by inoculation of microbes from soils. ISME J 6:1629-39.
- 529 13. de Oliveira LF, Margis R. 2015. The source of the river as a nursery for microbial  
530 diversity. PLoS One 10:e0120608.
- 531 14. Araya R, Tani, K., Takagi, T., Yamaguchi, N., Nasu, M. 2003. Bacterial activity and  
532 community composition in stream water and biofilm from an urban river determined by  
533 fluorescent in situ hybridization and DGGE analysis. FEMS Microbiol Ecol 43:111-119.
- 534 15. Besemer K, Moeseneder MM, Arrieta JM, Herndl GJ, Peduzzi P. 2005. Complexity of  
535 bacterial communities in a river-floodplain system (Danube, Austria). Appl Environ  
536 Microbiol 71:609-20.
- 537 16. Crump BC, Hobbie, J. E. . 2005. Synchrony and seasonality in bacterioplankton  
538 communities of two temperate rivers. Limnol Oceanogr 50:12.
- 539 17. Crump BC, Peterson BJ, Raymond PA, Amon RMW, Rinehart A, McClelland JW,  
540 Holmes RM. 2009. Circumpolar synchrony in big river bacterioplankton. PNAS 106:5.
- 541 18. Ruiz-Gonzalez C, Proia L, Ferrera I, Gasol JM, Sabater S. 2013. Effects of large river  
542 dam regulation on bacterioplankton community structure. FEMS Microbiol Ecol 84:316-  
543 31.
- 544 19. Staley C, Gould TJ, Wang P, Phillips J, Cotner JB, Sadowsky MJ. 2015. Species sorting  
545 and seasonal dynamics primarily shape bacterial communities in the Upper Mississippi  
546 River. Sci Total Environ 505:435-45.



- 547 20. Meziti A, Tsementzi D, Ar Kormas K, Karayanni H, Konstantinidis KT. 2016.  
548 Anthropogenic effects on bacterial diversity and function along a river-to-estuary  
549 gradient in Northwest Greece revealed by metagenomics. *Environ Microbiol* 18:4640-  
550 4652.
- 551 21. Ruiz-Gonzalez C, Nino-Garcia JP, Kembel SW, Del Giorgio PA. 2017. Identifying the  
552 core seed bank of a complex boreal bacterial metacommunity. *ISME J* 11:2012-2021.
- 553 22. Staley C, Unno T, Gould TJ, Jarvis B, Phillips J, Cotner JB, Sadowsky MJ. 2013.  
554 Application of Illumina next-generation sequencing to characterize the bacterial  
555 community of the Upper Mississippi River. *J Appl Microbiol* 115:1147-58.
- 556 23. Read DS, Gweon HS, Bowes MJ, Newbold LK, Field D, Bailey MJ, Griffiths RI. 2015.  
557 Catchment-scale biogeography of riverine bacterioplankton. *ISME J* 9:516-26.
- 558 24. Portillo MC, Anderson SP, Fierer N. 2012. Temporal variability in the diversity and  
559 composition of stream bacterioplankton communities. *Environ Microbiol* 14:2417-28.
- 560 25. Zwart G, Crump, B. C., Kamst-van Agetveld, M. P., Hagen, F., Han, S. . 2002. Typical  
561 freshwater bacteria: An analysis of available 16S rRNA gene sequences from plankton of  
562 lakes and rivers. *Aquatic Microbial Ecology* 28:15.
- 563 26. Gesch DB, Oimoen M, Greenlee S, Nelson C, Steuck M, Tyler D. 2002. The National  
564 Elevation Dataset: Photogrammetric Engineering and Remote Sensing. 68:5-32.
- 565 27. Simley JD, Carswell Jr., W.J. 2009. The National Map- Hydrography. US Geological  
566 Survey Fact Sheet 2009 3054:4.
- 567 28. Homer CG, Dewitz JA, Yang L, Jin, S., Danielson P, Xian G, Coulston J, Herold ND,  
568 Wickham JD, Megown K. 2015. Completion of the 2011 National Land Cover Database

- 569 for the conterminous United States-Representing a decade of land cover change  
570 information. *Photogrammetric Engineering and Remote Sensing* 81:345-354.
- 571 29. Xian G, Homer CG, Dewitz JA, Fry J, Hossain N, Wickham JD. 2011. The change of  
572 impervious surface area between 2001 and 2006 in the conterminous United States.  
573 *Photogrammetric Engineering and Remote Sensing* 77:758-762.
- 574 30. Tinker KA, Ottesen EA. 2016. The Core Gut Microbiome of the American Cockroach,  
575 *Periplaneta americana*, Is Stable and Resilient to Dietary Shifts. *Appl Environ Microbiol*  
576 82:6603-6610.
- 577 31. Schloss PD, Westcott SL, Ryabin T, Hall JR, Hartmann M, Hollister EB, Lesniewski RA,  
578 Oakley BB, Parks DH, Robinson CJ, Sahl JW, Stres B, Thallinger GG, Van Horn DJ,  
579 Weber CF. 2009. Introducing mothur: open-source, platform-independent, community-  
580 supported software for describing and comparing microbial communities. *Appl Environ*  
581 *Microbiol* 75:7537-41.
- 582 32. Rognes T, Flouri T, Nichols B, Quince C, Mahé F. 2016. VSEARCH: a versatile open  
583 source tool for metagenomics. *PeerJ* 4.
- 584 33. Rohwer RR, Hamilton JJ, Newton RJ, McMahon KD. 2018. TaxAss: Leveraging a  
585 Custom Freshwater Database 2 Achieves Fine-Scale Taxonomic Resolution. *mSphere*  
586 doi:10.1101/214288.
- 587 34. Wang Q, Garrity GM, Tiedje JM, Cole JR. 2007. Naive Bayesian Classifier for Rapid  
588 Assignment of rRNA Sequences into the New Bacterial Taxonomy. *Applied and*  
589 *Environmental Microbiology* 73:5261-5267.

- 590 35. McDonald D, Price MN, Goodrich J, Nawrocki EP, DeSantis TZ, Probst A, Andersen  
591 GL, Knight R, Hugenholtz P. 2012. An improved Greengenes taxonomy with explicit  
592 ranks for ecological and evolutionary analyses of bacteria and archaea. *ISME J* 6:610-8.
- 593 36. Oksanen J, Blanchet FG, Kindt R, Legendre P, O'Hara RB, Simpson GL, Solymos P,  
594 Stevens H, Wagner HH. 2011. *Vegan: Community Ecology Package*. R Package Version  
595 1.17-8.
- 596 37. Underground W. Weather history for Ben-Epps Airport, Athens, GA. Wunderground.
- 597 38. Newton RJ, Jones SE, Eiler A, McMahon KD, Bertilsson S. 2011. A guide to the natural  
598 history of freshwater lake bacteria. *Microbiol Mol Biol Rev* 75:14-49.
- 599 39. Lear G, Anderson MJ, Smith JP, Boxen K, Lewis GD. 2008. Spatial and temporal  
600 heterogeneity of the bacterial communities in stream epilithic biofilms. *FEMS Microbiol*  
601 *Ecol* 65:463-73.
- 602 40. Zeglin LH. 2015. Stream microbial diversity in response to environmental changes:  
603 review and synthesis of existing research. *Front Microbiol* 6:454.
- 604 41. Kaushik R, Balasubramanian R, Dunstan H. 2014. Microbial quality and phylogenetic  
605 diversity of fresh rainwater and tropical freshwater reservoir. *PLoS One* 9:e100737.
- 606 42. Simon RD, Makarewicz JC. 2009. Storm water events in a small agricultural watershed:  
607 Characterization and evaluation of improvements in stream water microbiology following  
608 implementation of Best Management Practices. *Journal of Great Lakes Research* 35:76-  
609 82.
- 610 43. Schultz Jr GE, Kovatch JJ, Anneken EM. 2013. Bacterial diversity in a large, temperate,  
611 heavily modified river, as determined by pyrosequencing. *Aquatic Microbial Ecology*  
612 70:169-179.

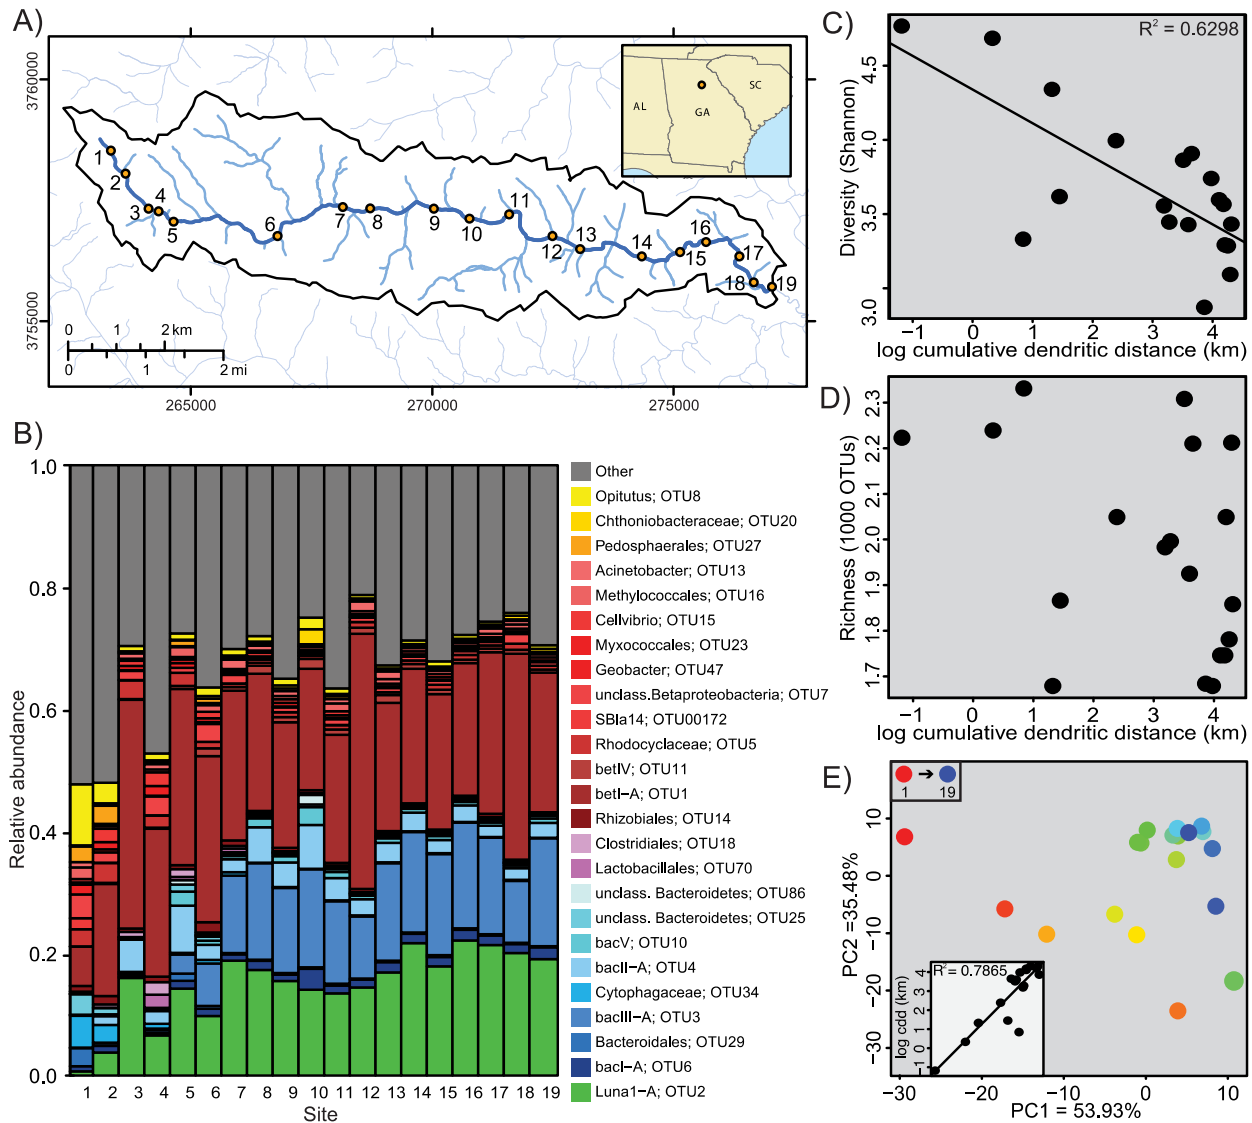

613

614 Figure 1: Transitions in bacterial communities from the headwaters to downstream sites on  
 615 McNutt Creek. A) McNutt creek is shown in dark blue and all samples were taken along its  
 616 length (at numbered collection sites). Tributaries are shown in light blue. B) The relative  
 617 abundance of OTUs at each location. All OTUs representing 1.5% or more of the community in  
 618 any sample in the full study (including samples not shown here) are displayed. All taxa falling  
 619 beneath this threshold were group into the other category in grey. Samples are aligned by their  
 620 location along the creek, starting at the headwaters, as shown in A. Shannon diversity (C) and  
 621 OTU richness (D) is shown for each sample and displayed according to the CDD at that location

622 in the stream. E) Ordination of samples along PC1 and 2 are display in color according to their  
623 location along the stream path, with upstream-most samples in red, working down the color  
624 spectrum to purple. Inset displays PC1 values for each site plotted against cumulative dendritic  
625 distance.

626

627

628

629

630

631

632

633

634

635

636

637

638

639

640

641

642

643

644

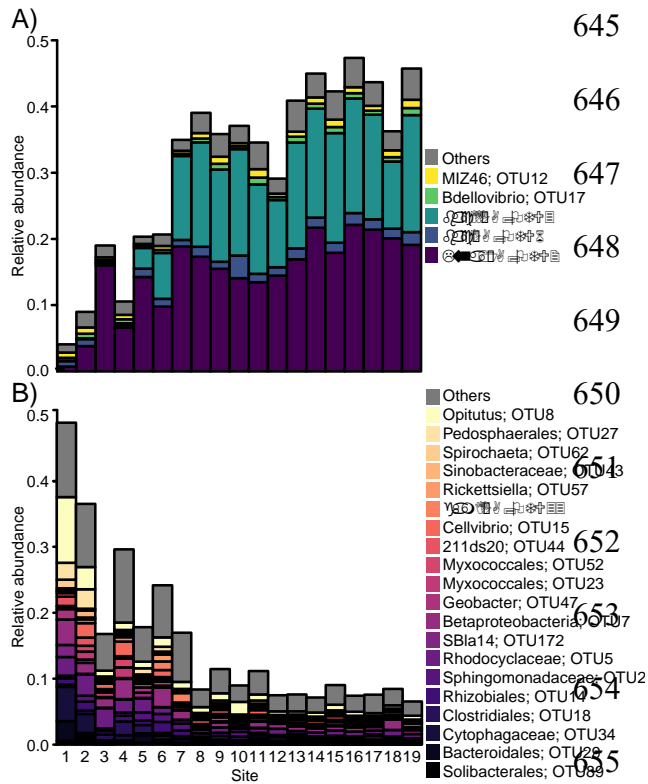

656 Figure 2. Changes in the abundance of positively and negatively correlated OTUs along the  
 657 stream length. The relative abundance of all significantly positively (A) or negatively (B)  
 658 correlated taxa comprising at least 1% of any sample are displayed in color. All additional taxa  
 659 below this threshold are reported as “others” in grey. OTU numbers are reported to the right of  
 660 all taxa for reference.

661

662

663

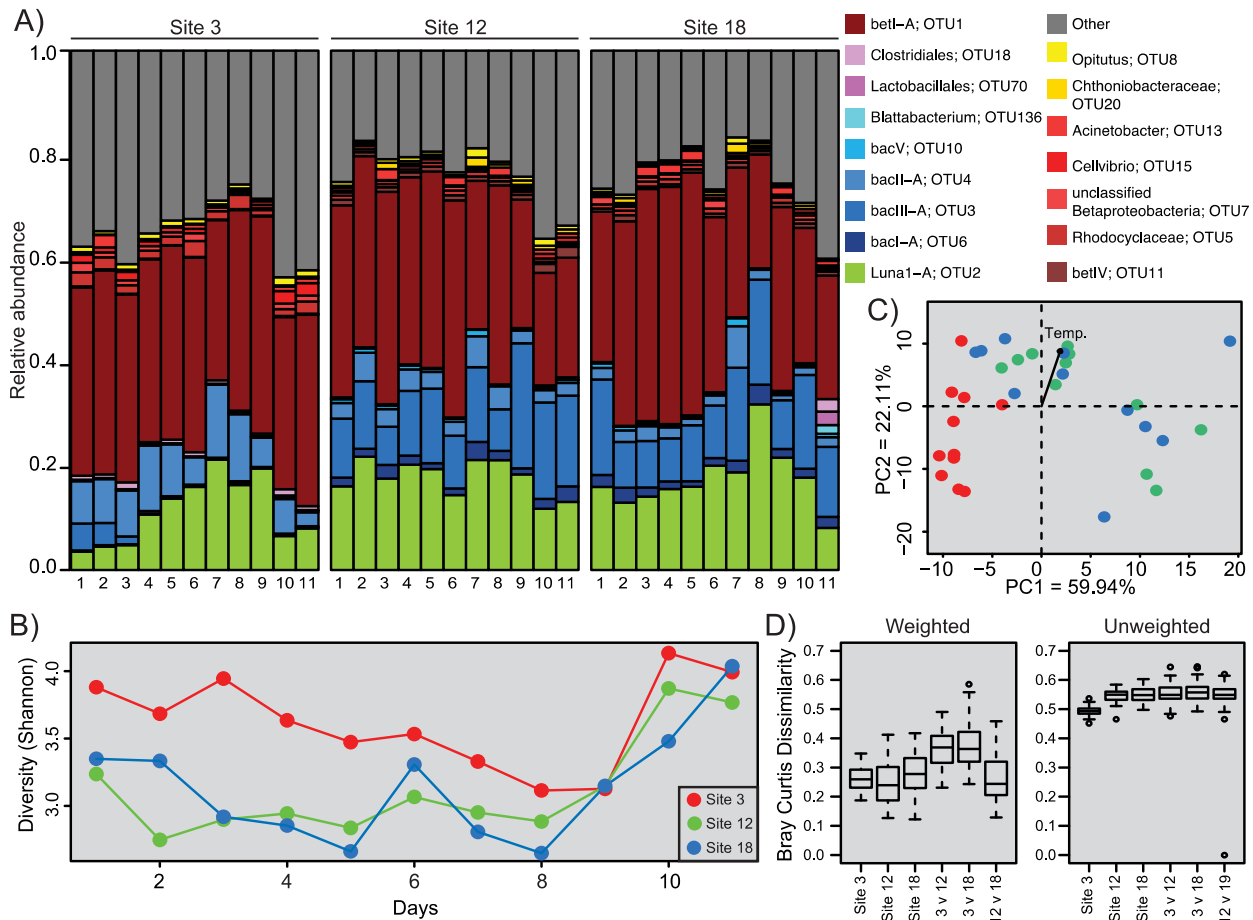

664

665 Figure 3: Daily analysis of bacterioplankton communities across the length of the creek. A) The  
 666 relative abundance of OTUs present at >1.5% of any one sample is displayed (all other OTUs are  
 667 grouped under 'other'). B) Shannon diversity plotted against day of sampling for each of the three  
 668 selected sites, with site 1, 12 and 19 shown by red, green and blue dots, respectively. This color  
 669 scheme was used to show sample ordination in the PCA plot displayed in C), in which envfit was  
 670 used to calculate loadings of the parameters listed in Table S1. D) Bray Curtis dissimilarity was  
 671 determined for and between all samples taken from each site. Blue dots represent individual  
 672 samples and open circles represent outliers.

673

674

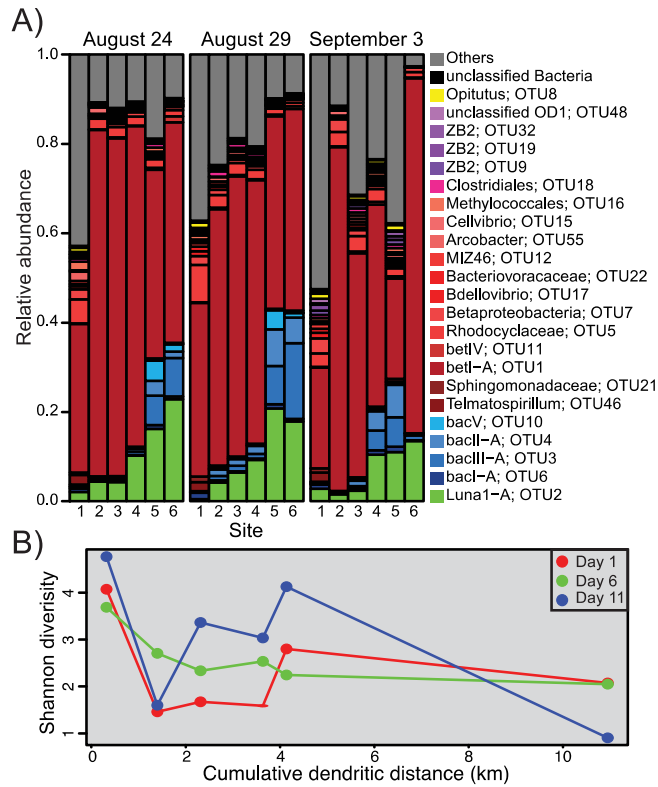

675

676 Figure 4. Community analysis of all headwater site samples collected at three time points. A)

677 The relative abundance of taxa present in each sample is displayed according to the parameters

678 defined in Fig. 1. B) Diversity for each sample plotted according to the CDD measurement for

679 each site.

680

681

682

683

684

685

686

687



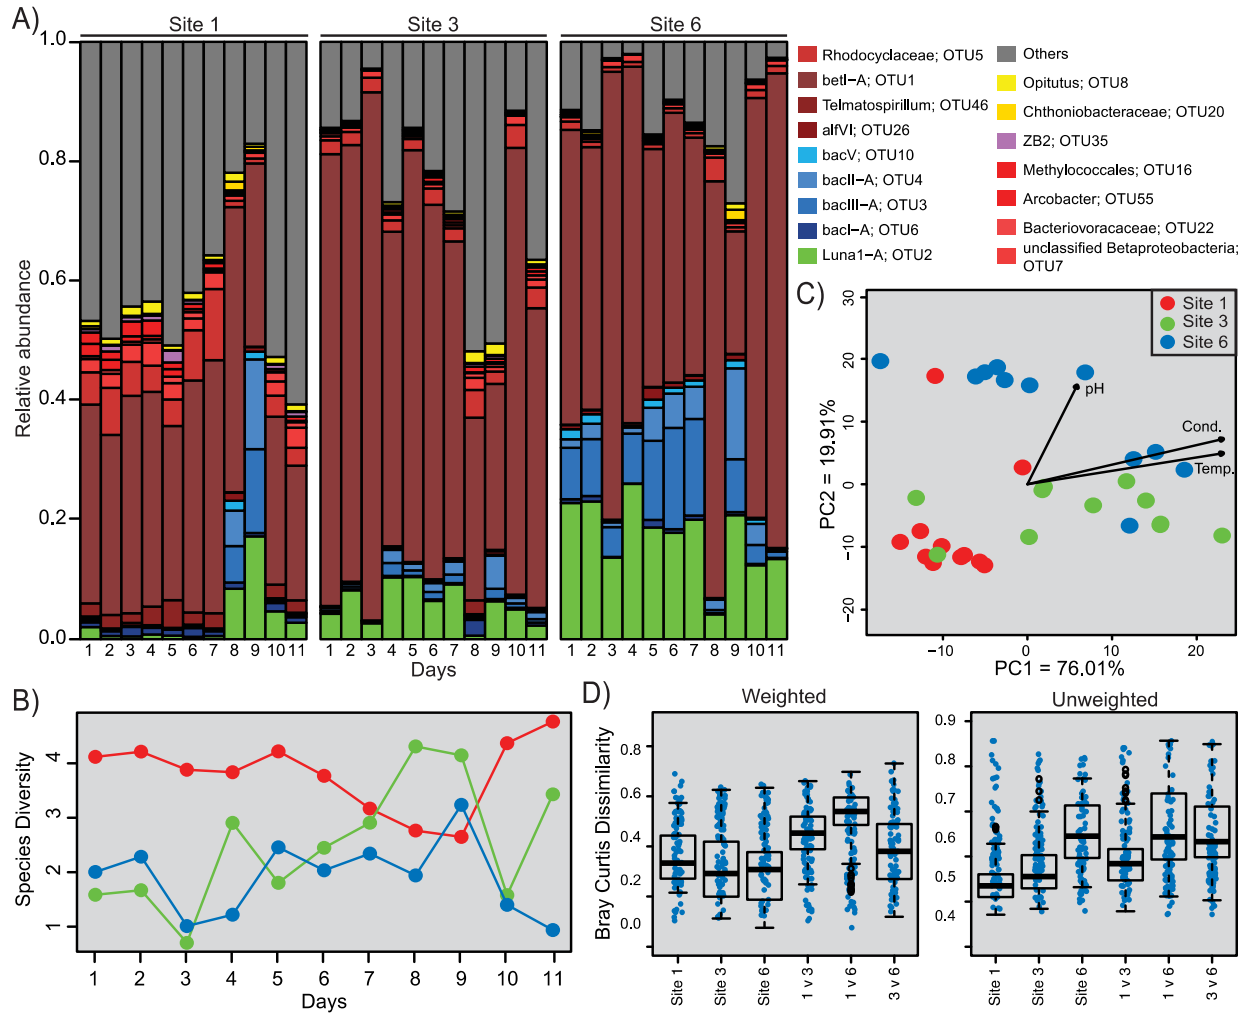

688

689 Figure 5. Analysis of daily water samples collected from three headwater-proximal sites across

690 multiple days. A) Relative abundance of all taxa present in each sample is displayed according to

691 parameters defined in Fig. 1. B) Community diversity observed at each site over the course of the

692 study, with samples from site 1, 3 and 6 represented by red, green and blue points, respectively.

693 C) Ordination of all daily samples in the resulting PCA plot. D) Bray Curtis dissimilarity was

694 determined for and between all samples taken from each site. Blue dots represent individual

695 samples and open circles represent outliers.

696

697

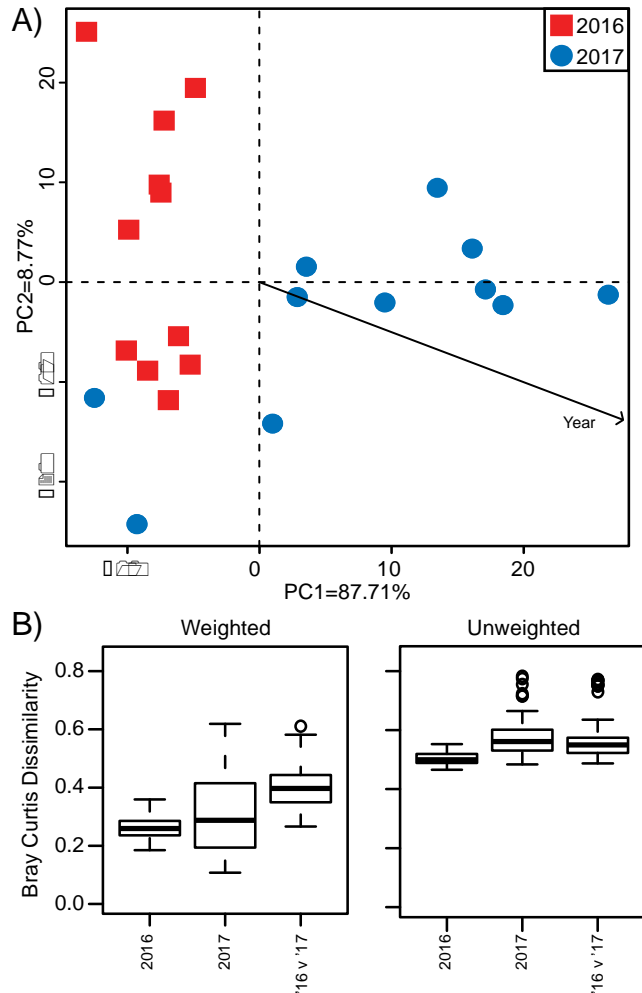

698

699 Fig. 6. Comparison of site 3 across years. A) Resulting ordination plot of PCA analysis. Samples

700 collected in 2016 and 2017 are represented by squares and circles, respectively. Envfit was run

701 with daily metadata but no values were significant. B) Bray Curtis dissimilarity was calculated

702 for samples from each year and between years.

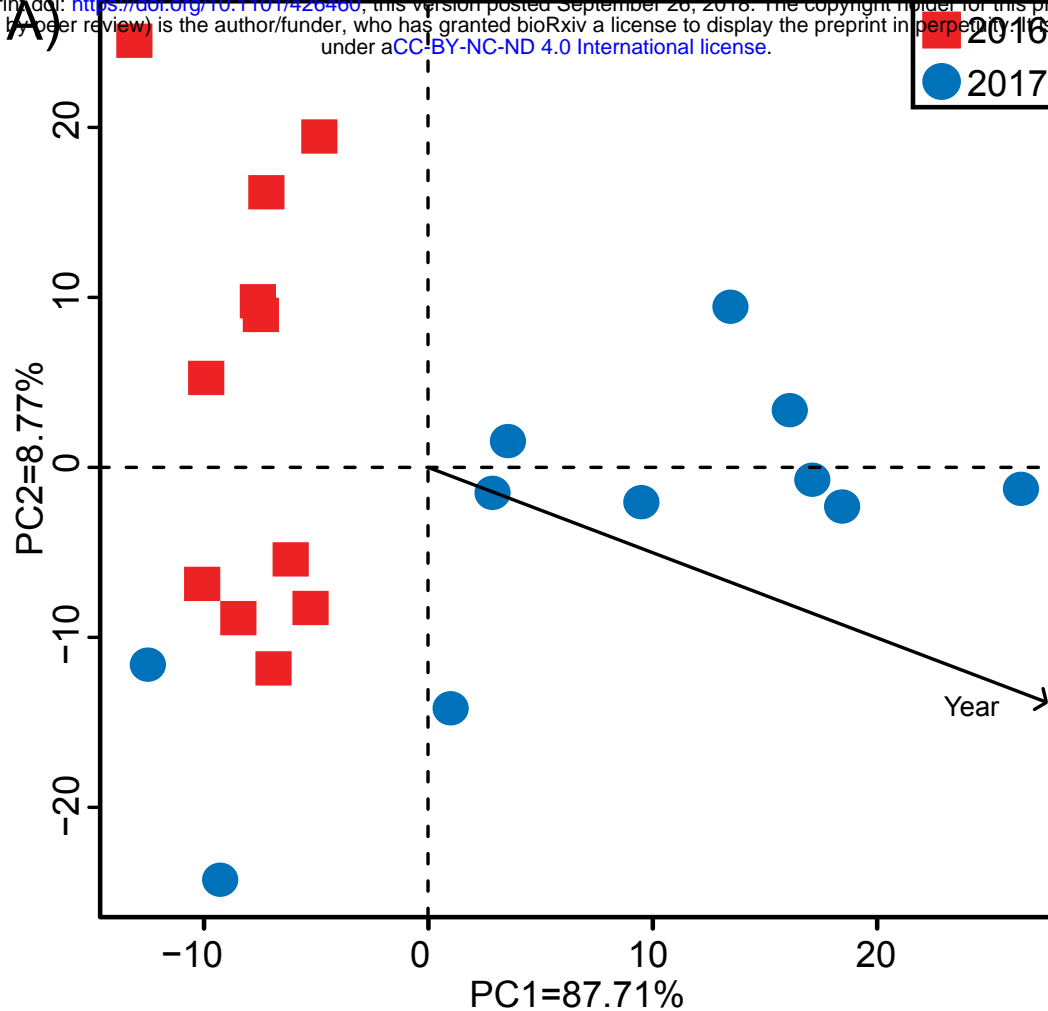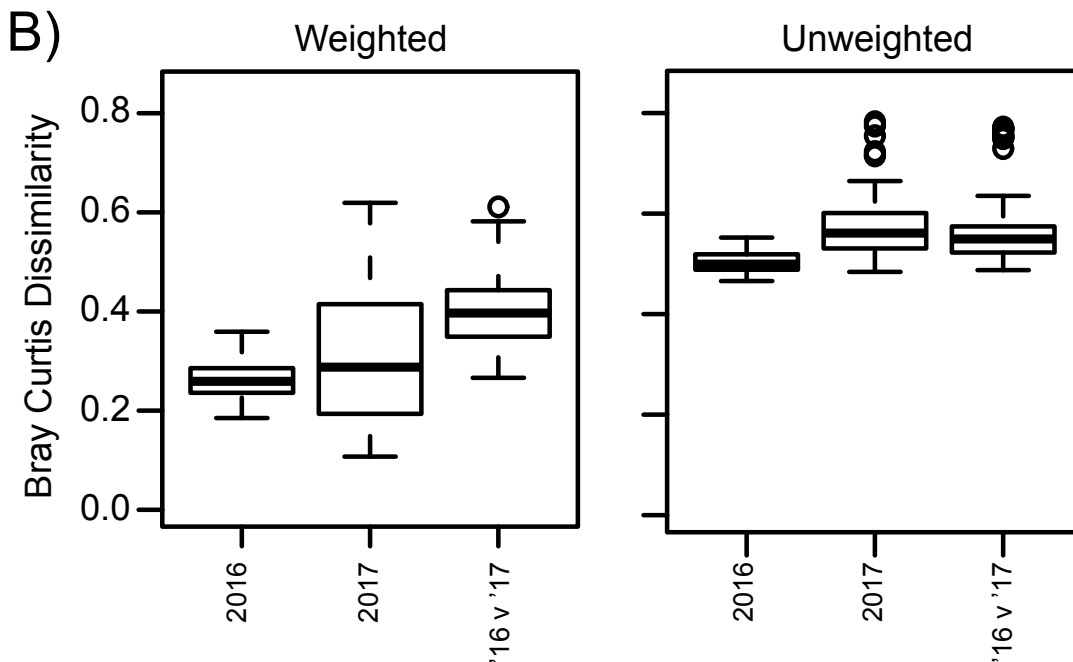

Figure 6. Comparison of site 3 across years. A) Resulting ordination of PCA analysis. Envfit was run with daily metadata but no values were significant. B) Bray Curtis dissimilarity was calculated for samples from each year and between years.

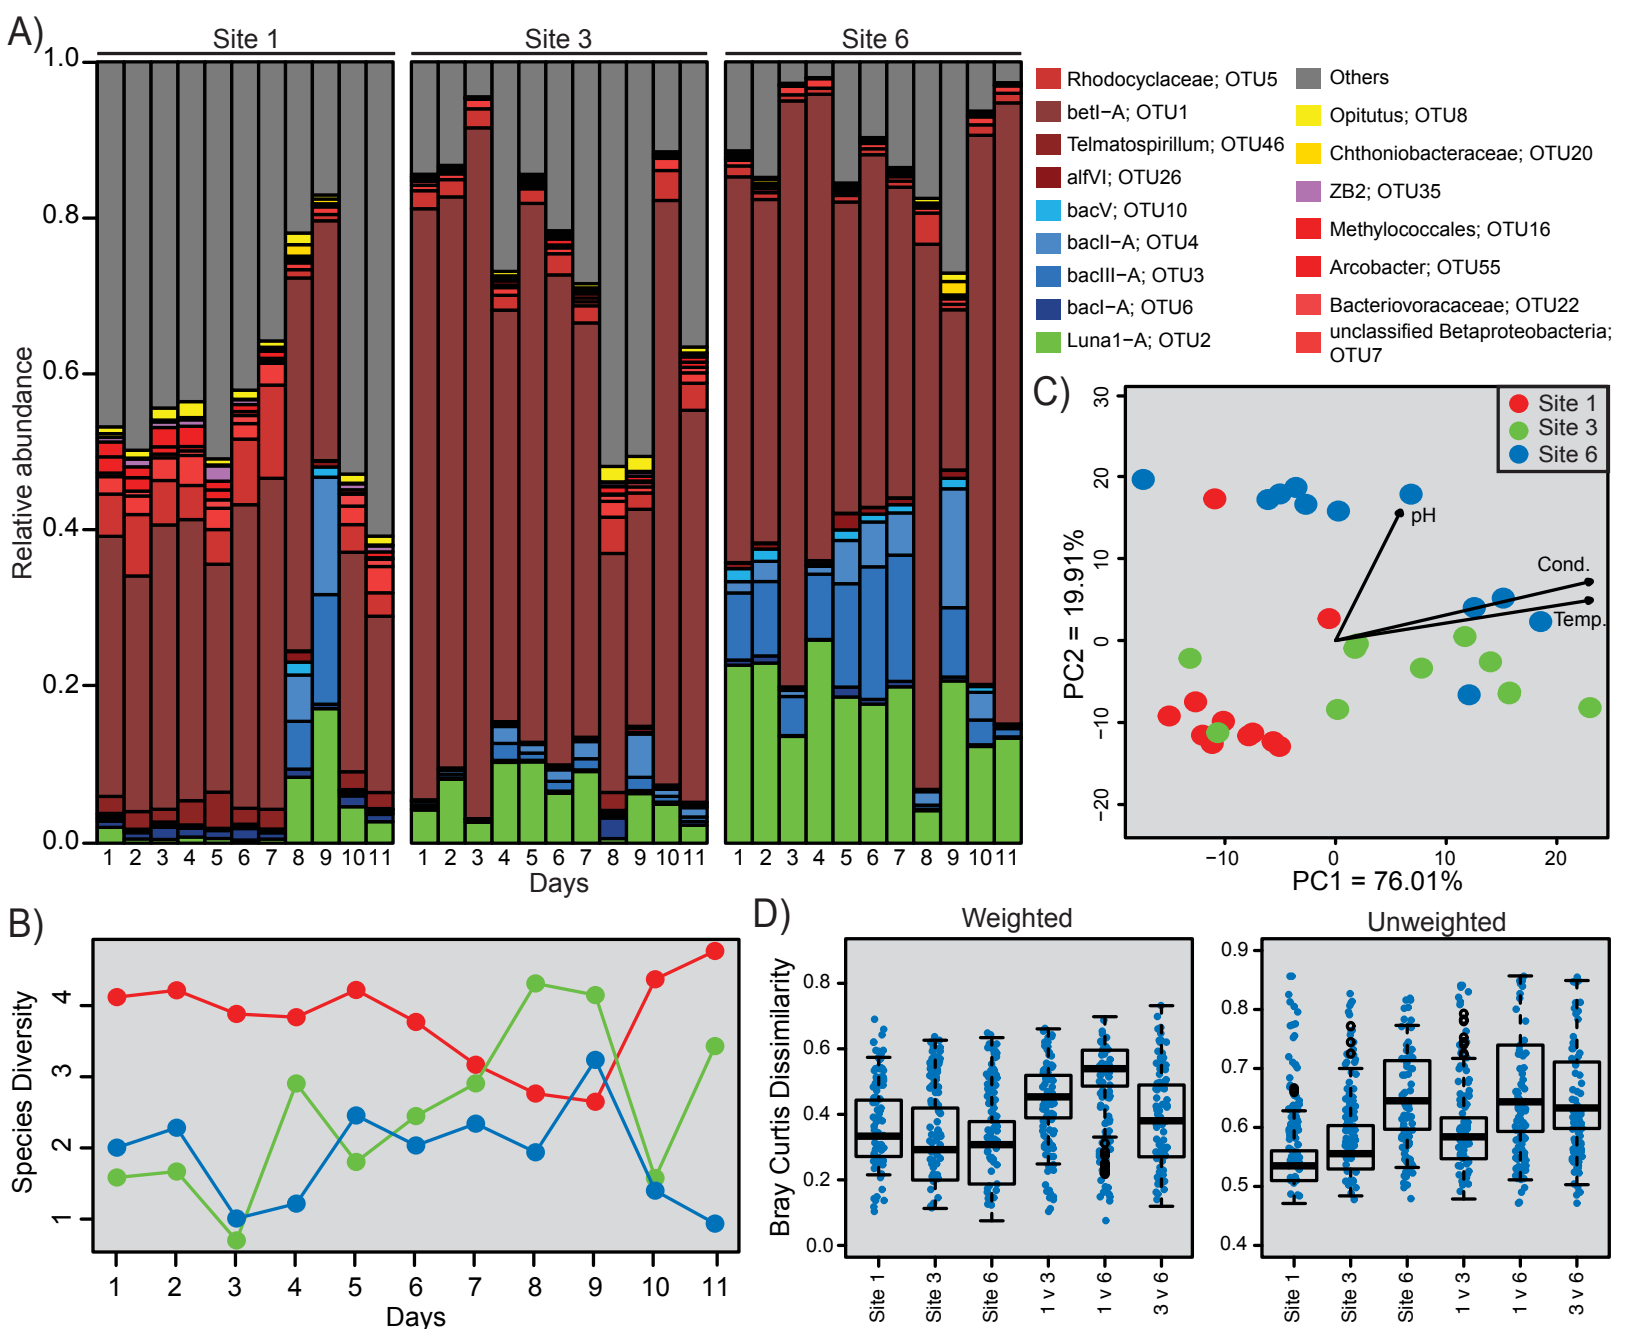

Figure 5. Analysis of daily water samples collected from three headwaters sites across multiple days. A) Relative abundance of all taxa present in each sample is displayed according to parameters defined in Fig. 1. B) Community diversity observed at each site over the course of the study, with samples from site 1, 3 and 6 represented by red, green and blue points, respectively. C) Ordination of all daily samples in the resulting PCA plot. D) Bray Curtis dissimilarity was determined for and between all samples taken from each site. Blue dots represent individual samples and open circles represent outliers

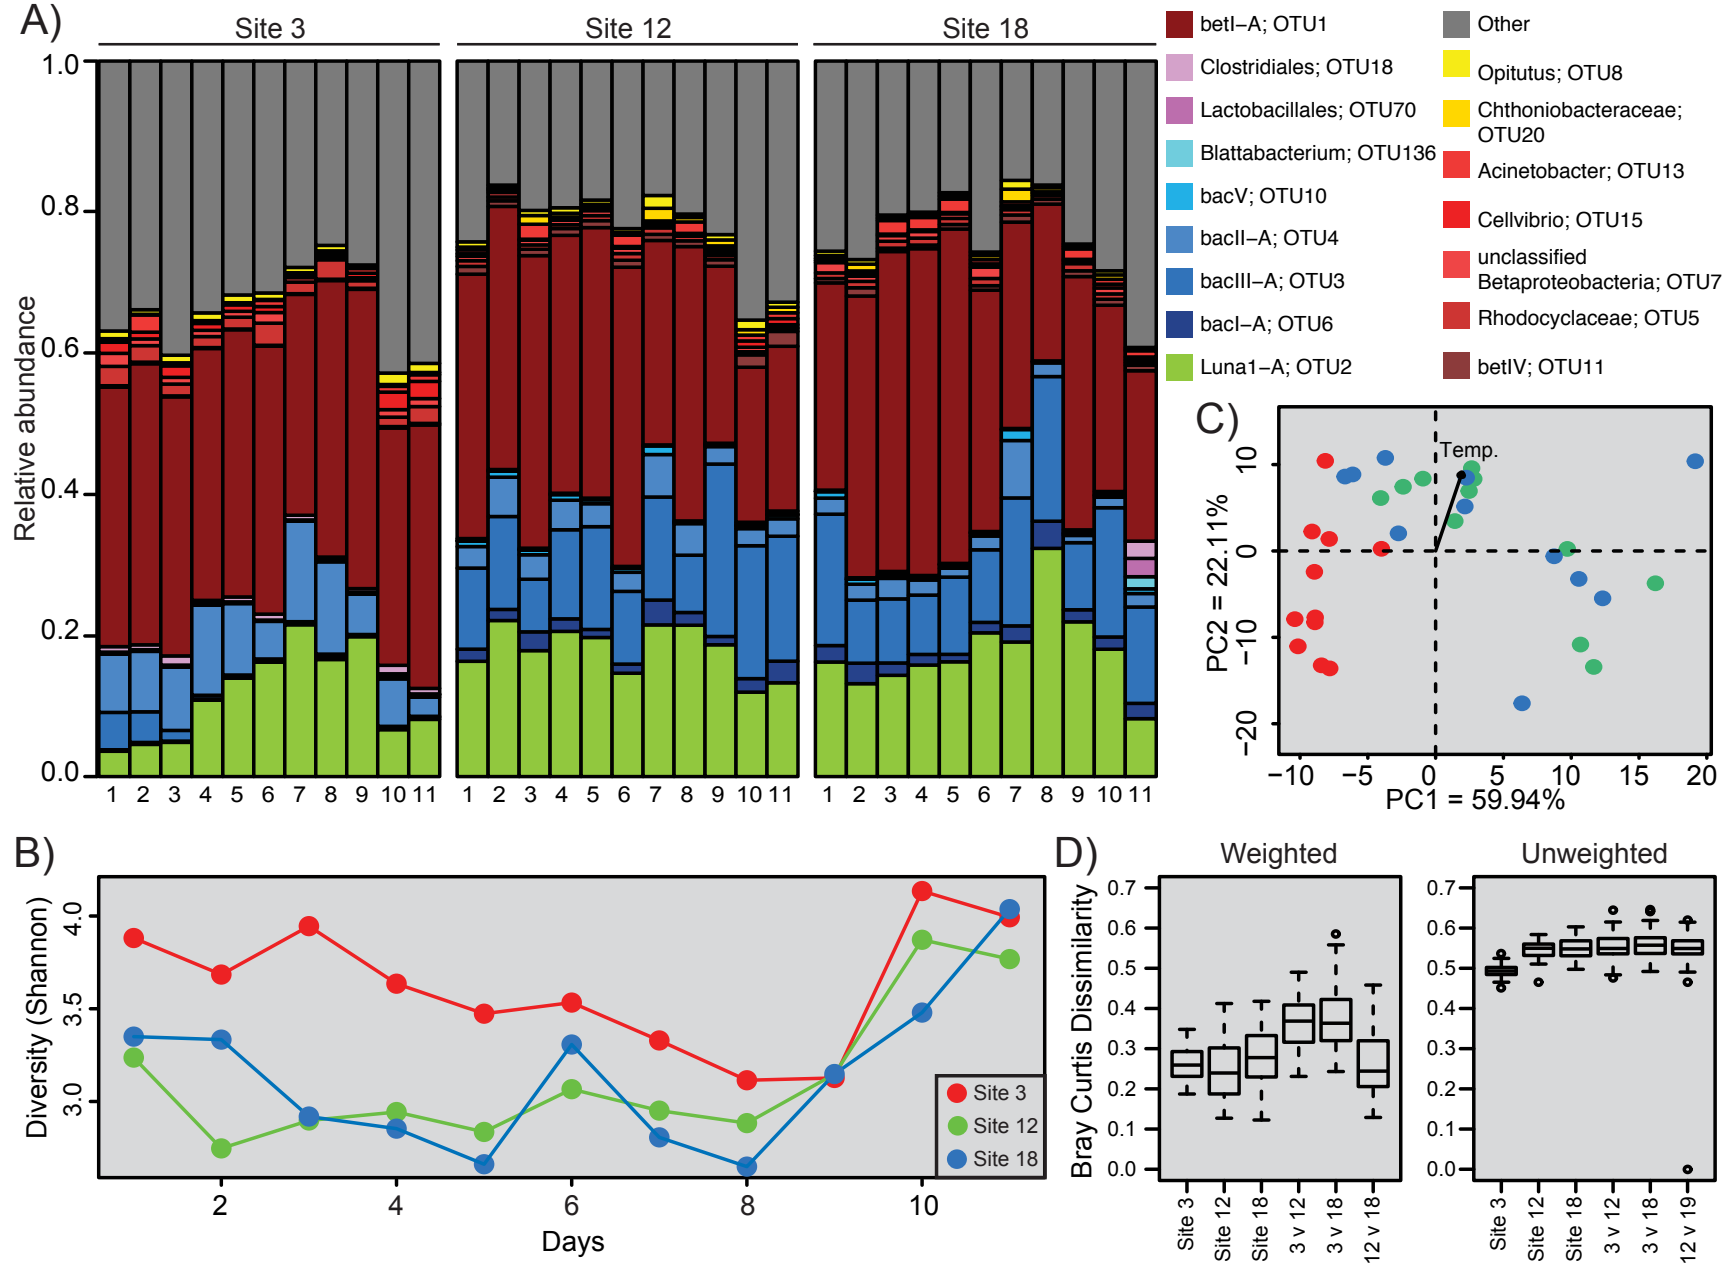

Figure 3: Daily analysis of bacterioplankton communities across the length of the creek. A) The relative abundance of OTUs present at >1.5% of any one sample is displayed (all other OTUs are grouped under 'other'). B) Shannon diversity plotted against day of sampling for each of the three selected sites, with site 1, 12 and 18 shown by red, green and blue dots, respectively. This color scheme was used to show sample ordination in the PCA plot displayed in C), in which envfit was used to calculate loadings of the parameters listed in Table S1. D) Bray-Curtis dissimilarity was determined for and between all samples taken from each site.

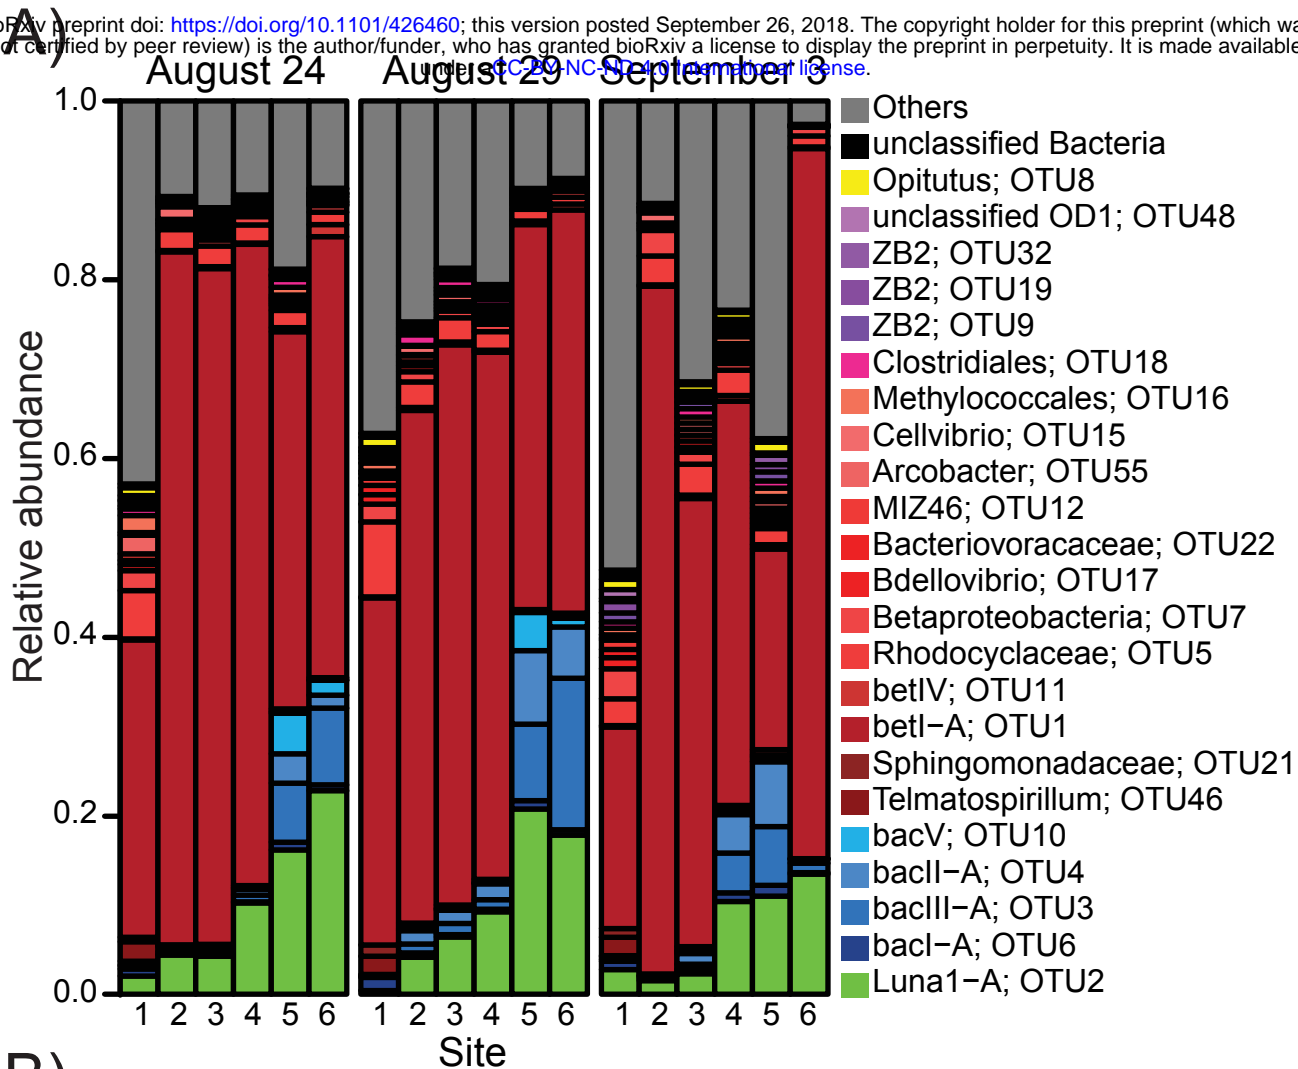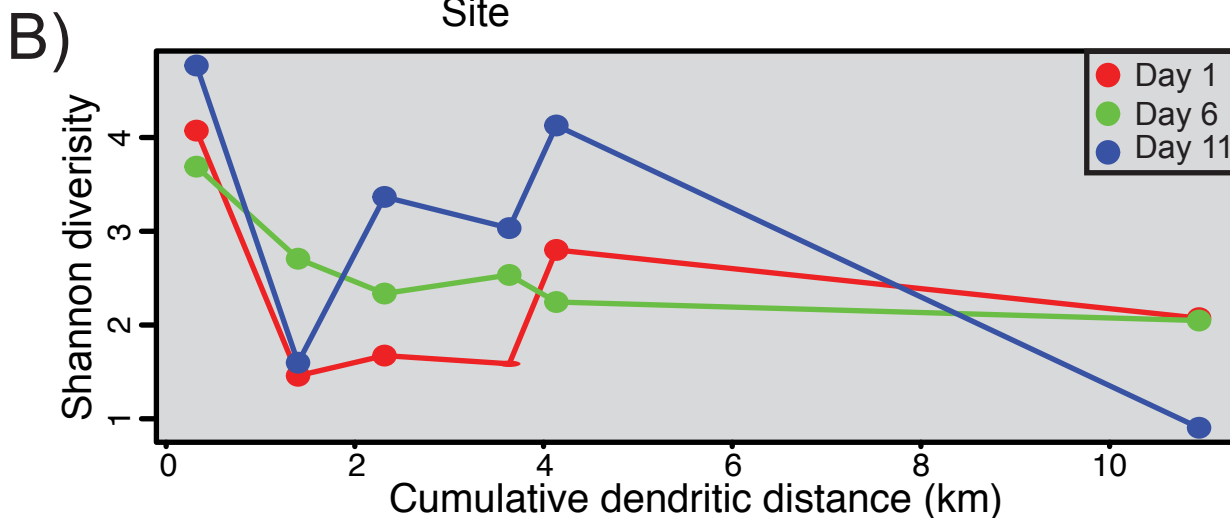

Figure 4. Community analysis of all headwater site samples collected between at three time points in 2017. A) The relative abundance of taxa present in each sample is displayed according to the parameters defined in Fig. 1. B) Diversity for each sample plotted according to the cumulative dendritic distance measurement for each site.

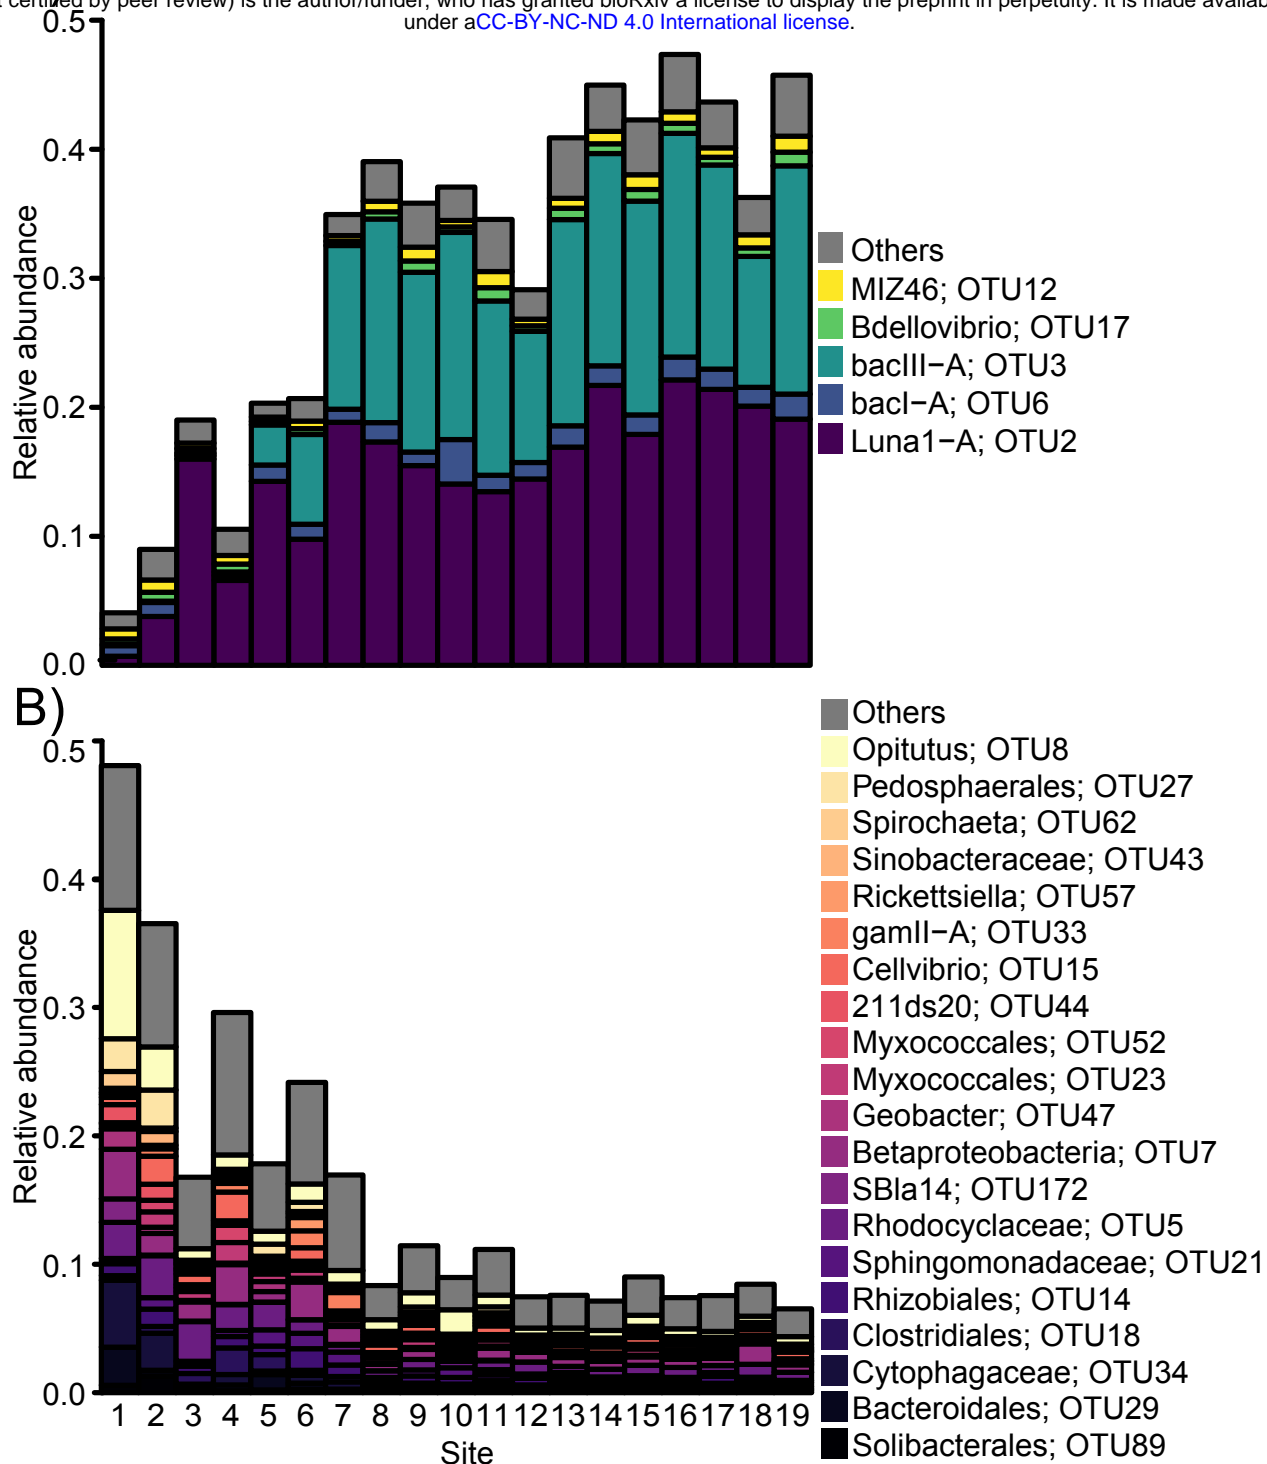

Figure 2. Changes in the positively and negatively correlated OTUs along the stream length. The relative abundance of all significantly positively (A) or negatively (B) correlated taxa comprising at least 1% of any sample are displayed in color. All additional taxa below this threshold are reported as “others” in grey. OTU numbers are reported to the right of all taxa for reference.

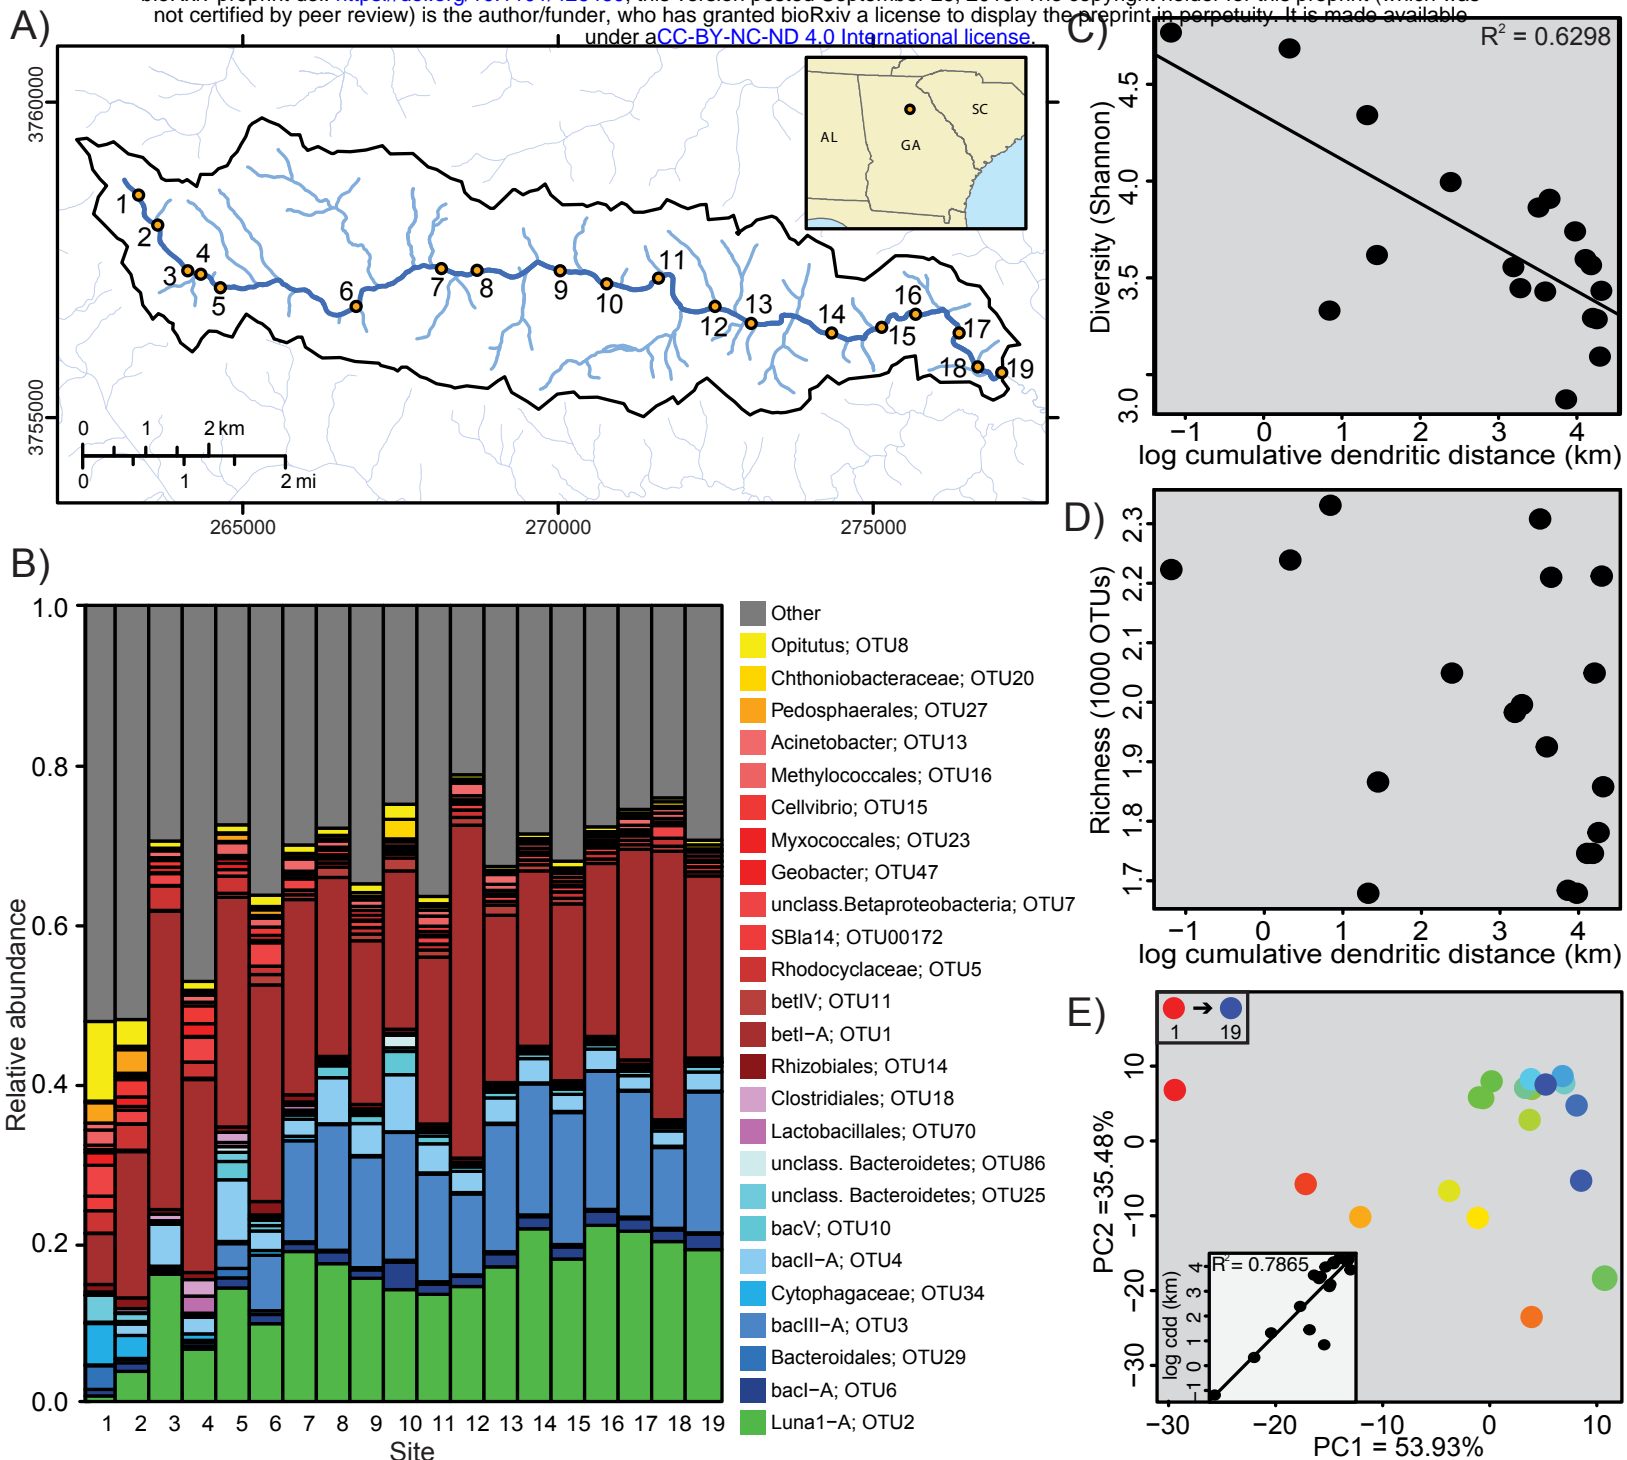

Figure 1: Transitions in bacterial communities from the headwaters of McNutt Creek to downstream sites. A) The flow path of McNutt creek is shown in dark blue and all samples were taken along its length, noted by the numbered collection sites. Tributaries are shown in light blue. B) The relative abundance of OTUs at each location. All OTUs representing 1.5% or more of the community in any sample in the full study (including samples not shown here) are displayed. All taxa falling beneath this threshold were group into the other category in grey. Samples are aligned by their location along the creek, starting at the headwaters, as shown in A. Shannon diversity (C) and OTU richness (D) is shown for each sample and displayed according to the cumulative dendritic distance at that location in the stream. E) Ordination of samples along PC1 and 2 are display in color according to their location along the stream path, with upstream-most samples in red, working down the color spectrum to purple. Inset displays PC1 values for each site plotted against cumulative dendritic distance.
